# Supplementary material
Source: ML conference proceedings conference paper supplement (https://openreview.net/forum?id=hNpedVWwoe)
Supplement: supplementary_material [file attachment]

---

# Near Optimal Reconstruction of Spherical Harmonic Expansions

---

Anonymous Author(s)  
Affiliation

## Abstract

1 We propose an algorithm for robust recovery of the spherical harmonic expansion  
2 of functions defined on the  $d$ -dimensional unit sphere  $\mathbb{S}^{d-1}$  using a near-optimal  
3 number of function evaluations. We show that for any  $f \in L^2(\mathbb{S}^{d-1})$ , the number  
4 of evaluations of  $f$  needed to recover its degree- $q$  spherical harmonic expansion  
5 equals the dimension of the space of spherical harmonics of degree at most  $q$ , up to  
6 a logarithmic factor. Moreover, we develop a simple yet efficient kernel regression-  
7 based algorithm to recover degree- $q$  expansion of  $f$  by only evaluating the function  
8 on uniformly sampled points on  $\mathbb{S}^{d-1}$ . Our algorithm is built upon the connections  
9 between spherical harmonics and Gegenbauer polynomials. Unlike the prior results  
10 on fast spherical harmonic transform, our proposed algorithm works efficiently  
11 using a nearly optimal number of samples in any dimension  $d$ . Furthermore, we  
12 illustrate the empirical performance of our algorithm on numerical examples.

## 13 1 Introduction

14 We consider the fundamental problem of recovering a function from a finite number of (noisy)  
15 observations. To provide accurate and reliable predictions at unobserved points we need to avoid  
16 overfitting which is typically achieved through restricting our estimator or interpolant to a family of  
17 *smooth or structured* functions. In this paper, we focus on interpolating square-integrable functions on  
18 the  $d$ -dimensional unit sphere, with low-degree spherical harmonics. Spherical harmonics are essential  
19 in various theoretical and practical applications, including the representation of electromagnetic  
20 fields [Wei95], gravitational potential [Wer97], cosmic microwave background radiation [KKS97]  
21 and medical imaging [CLL15], as well as modelling of 3D shapes in computer graphics [KFR03].

22 We begin by observing that any function  $f$  in  $L^2(\mathbb{S}^{d-1})$ , i.e., the family of square-integrable functions  
23 on the sphere  $\mathbb{S}^{d-1}$ , can be uniquely decomposed into orthogonal spherical harmonic components.  
24 Specifically, if we denote the space of spherical harmonics of degree  $\ell$  in dimension  $d$  by  $\mathcal{H}_\ell(\mathbb{S}^{d-1})$ ,  
25 any  $f \in L^2(\mathbb{S}^{d-1})$  has a unique orthogonal expansion  $f = \sum_{\ell=0}^{\infty} f_\ell$  with  $f_\ell \in \mathcal{H}_\ell(\mathbb{S}^{d-1})$  (Lemma 2).  
26 With this observation, we aim to find the best spherical harmonic approximation of degree  $\leq q$  to  $f$   
27 using minimal number of samples (essentially treating higher order terms in  $f$ 's expansion as noise).

28 **Problem 1** (Informal Version of Problem 2). *For an unknown function  $f \in L^2(\mathbb{S}^{d-1})$  and an integer*  
29  *$q \geq 1$ , efficiently (both in terms of number of samples from  $f$  and computations) learn the first  $q + 1$*   
30 *spherical harmonic components  $\{f_\ell \in \mathcal{H}_\ell(\mathbb{S}^{d-1})\}_{\ell=0}^q$  of  $f$  which minimize*

$$\left\| \sum_{\ell=0}^q f_\ell - f \right\|_{\mathbb{S}^{d-1}}^2 := \int_{\mathbb{S}^{d-1}} \left| \sum_{\ell=0}^q f_\ell(w) - f(w) \right|^2 dw. \quad (1)$$

31 The *angular power spectrum* of  $f$  commonly obeys a power law decay of the form  $\|f_\ell\|_{\mathbb{S}^{d-1}}^2 \leq$   
32  $\mathcal{O}(\ell^{-s})$ , for some  $s > 0$ , depending on the order of differentiability of  $f$ . In fact, for any infinitely

differentiable  $f$ ,  $\|f_\ell\|_{\mathbb{S}^{d-1}}^2$  decays asymptotically faster than any rational function of  $\ell$ . Furthermore, for any real analytic  $f$  on the sphere,  $\|f_\ell\|_{\mathbb{S}^{d-1}}^2$  decays exponentially. Thus, the first  $q + 1$  spherical harmonic components of  $f$  typically well approximate  $f$  for even modest  $q$ , and answering Problem 1 is meaningful for a wide range of differentiable functions.

## 1.1 Our Main Results

We reformulate Problem 1 as a least-squares regression and then solve it using randomized numerical linear algebra techniques. We first consider an orthonormal projection operator that maps functions in  $L^2(\mathbb{S}^{d-1})$  onto the space of bounded-degree spherical harmonics  $\bigoplus_{\ell=0}^q \mathcal{H}_\ell(\mathbb{S}^{d-1})$ . Specifically, if  $\mathcal{K}_d^{(q)}$  is an operator that maps any  $f$  with expansion  $f = \sum_{\ell=0}^\infty f_\ell$  where  $f_\ell \in \mathcal{H}_\ell(\mathbb{S}^{d-1})$ , onto  $f$ 's first  $q + 1$  expansion components, i.e.,  $\mathcal{K}_d^{(q)} f = \sum_{\ell=0}^q f_\ell$ , then Problem 1 can be formulated as

$$\min_{g \in L^2(\mathbb{S}^{d-1})} \left\| \mathcal{K}_d^{(q)} g - f \right\|_{\mathbb{S}^{d-1}}^2.$$

However, solving this regression problem with “continuous” cost function is challenging. To avoid such continuous optimizations, we adopt the approach of [AKM<sup>+</sup>19] which discretizes the aforementioned regression problem according to the leverage scores of the operator  $\mathcal{K}_d^{(q)}$ . It turns out that if we can draw random samples with probabilities proportional to the leverage scores of  $\mathcal{K}_d^{(q)}$  then we can recover the degree- $q$  spherical harmonic expansion of  $f$ , i.e.  $\sum_{\ell=0}^q f_\ell$ , with finite number of observations. Particularly, by exploiting the connections between spherical harmonics and Zonal (Gegenbauer) Harmonics and the fact that zonal harmonics are the reproducing kernels of  $\mathcal{H}_\ell(\mathbb{S}^{d-1})$  (Lemma 3), we prove that the leverage scores of  $\mathcal{K}_d^{(q)}$  are constant everywhere on the sphere  $\mathbb{S}^{d-1}$ . Thus, solving a discrete regression problem with uniformly sampled observations yields a near-optimal solution to Problem 1. Informal statements of our results are as follows.

**Theorem 1** (Informal Version of Theorem 5). *Let  $\beta_{q,d}$  be the dimension of spherical harmonics of degree at most  $q$ , i.e.,  $\beta_{q,d} \equiv \dim(\bigoplus_{\ell=0}^q \mathcal{H}_\ell(\mathbb{S}^{d-1}))$ . There exists an algorithm that finds a  $(1 + \varepsilon)$ -approximation to the optimal solution of Problem 1, given  $s = \mathcal{O}(\beta_{q,d} \log \beta_{q,d} + \varepsilon^{-1} \beta_{q,d})$  observations of function  $f$  at uniformly sampled points on  $\mathbb{S}^{d-1}$ , with  $\mathcal{O}(s^2 d + s^\omega)^1$  runtime.*

We also prove that our bound on the number of required samples is optimal up to a logarithmic factor.

**Theorem 2** (Informal Version of Theorem 6). *Any (randomized) algorithm that takes  $s < \beta_{q,d}$  samples on any input fails with probability greater than  $9/10$ , where  $\beta_{q,d} \equiv \dim(\bigoplus_{\ell=0}^q \mathcal{H}_\ell(\mathbb{S}^{d-1}))$ .*

## 1.2 Related Work

Efficient reconstruction of functions as per Problem 1 has been extensively studied in various fields. Many prior papers considered reconstructing 1-dimensional functions from finite number of samples on a finite interval under smoothness assumption about the underlying function. Notably, the influential line of work of [SP61, LP61, LP62, XRY01] focused on reconstructing Fourier-bandlimited functions and [CKPS16, EMM20] considered interpolating Fourier-sparse signals. Recently, [AKM<sup>+</sup>19] unified these reconstruction methods in dimension  $d = 1$  and gave a universal sampling framework for reconstructing nearly all classes of functions with Fourier-based smoothness constraints. One can view 1-dimensional functions on a finite interval as functions on the unit circle  $\mathbb{S}^1$ . Thus, Problem 1 is indeed a generalization of the aforementioned prior work to high dimensions under the assumption that the generalized Fourier series (Lemma 2) of the underlying function only contains bounded-degree spherical harmonics. This degree constraint on spherical harmonic expansions can be viewed as the  $d$ -dimensional analog of Fourier-bandlimitedness on circle  $\mathbb{S}^1$ .

Computing the spherical harmonic expansion in dimension  $d = 3$  has received considerable attention in physics and applied mathematics communities. The algorithms for this special case of Problem 1 are known in the literature as “fast spherical harmonic transform” [SS00, ST02]. Most notably, [RT06] proposed an algorithm for computing spherical harmonic expansion of degree  $\leq q$  to precision  $\varepsilon$  using  $\mathcal{O}(\beta_{q,3})$  samples and  $\mathcal{O}(\beta_{q,3} \log \beta_{q,3} \cdot \log(1/\varepsilon))$  time. These fast algorithms were developed based on

<sup>1</sup> $\omega < 2.3727$  is the exponent of the fast matrix multiplication algorithm [Wil12]

78 fast Fourier and associated Legendre transforms and make use of a (well-conditioned) orthogonal basis  
 79 for  $\mathcal{H}_\ell(\mathbb{S}^{d-1})$ , which happened to be the associated Legendre polynomials when  $d = 3$ . However,  
 80 it is in general very difficult to compute an orthogonal basis for spherical harmonics [MNY06], so  
 81 unlike our Theorem 1, it is inefficient to extend these prior results to higher  $d$ .

82 From the techniques point of view, a related work is [GMMM21], which employs harmonic analysis  
 83 over  $\mathbb{S}^{d-1}$  to analyze the generalization of two-layered neural tangent kernels. They show that an  
 84 unknown function defined on  $\mathbb{S}^{d-1}$  can be efficiently recovered using kernel regression w.r.t. neural  
 85 tangent kernel on uniform random samples from the function. However, the number of samples  
 86 that [GMMM21] requires for recovering bounded degree spherical harmonics, especially when the  
 87 degrees are high, is sub-optimal and is strictly worse than our result. Additionally, this paper does not  
 88 guarantee recovery with relative error, while our Theorem 5 provides relative error guarantees.

## 89 2 Mathematical Preliminaries

90 We denote by  $\mathbb{S}^{d-1}$  the unit sphere in  $d$  dimension. We use  $|\mathbb{S}^{d-1}| = \frac{2\pi^{d/2}}{\Gamma(d/2)}$  to denote the surface  
 91 area of sphere  $\mathbb{S}^{d-1}$  and  $\mathcal{U}(\mathbb{S}^{d-1})$  to denote the uniform probability distribution on  $\mathbb{S}^{d-1}$ . We denote  
 92 by  $L^2(\mathbb{S}^{d-1})$  the set of all square-integrable real-valued functions on sphere  $\mathbb{S}^{d-1}$ . Furthermore, for  
 93 any  $f, g \in L^2(\mathbb{S}^{d-1})$  we use the following definition of the inner product on the unit sphere<sup>2</sup>,

$$\langle f, g \rangle_{\mathbb{S}^{d-1}} := \int_{\mathbb{S}^{d-1}} f(w)g(w)dw = |\mathbb{S}^{d-1}| \cdot \mathbb{E}_{w \sim \mathcal{U}(\mathbb{S}^{d-1})} [f(w)g(w)]. \quad (2)$$

94 The function space  $L^2(\mathbb{S}^{d-1})$  is complete with respect to the norm induced by the above inner  
 95 product, i.e.  $\|f\|_{\mathbb{S}^{d-1}} := \sqrt{\langle f, f \rangle_{\mathbb{S}^{d-1}}}$ , so  $L^2(\mathbb{S}^{d-1})$  is a *Hilbert space*.

96 We often use the term *quasi-matrix* which is informally defined as a “matrix” in which one dimension  
 97 is finite while the other is infinite. A quasi-matrix can be *tall* (or *wide*) meaning that there is a finite  
 98 number of columns (or rows) where each one is a functional operator. For a more formal definition,  
 99 see [SA22].

100 *Spherical Harmonics* are the solutions of Laplace’s equation in spherical domains and can be thought  
 101 of as functions defined on  $\mathbb{S}^{d-1}$  employed in solving partial differential equations. Formally,

102 **Definition 1** (Spherical Harmonics). *For integers  $\ell \geq 0$  and  $d \geq 1$ , let  $\mathcal{P}_\ell(d)$  be the space of degree- $\ell$*   
 103 *homogeneous polynomials with  $d$  variables and real coefficients. Let  $\mathcal{H}_\ell(d)$  denote the space of*  
 104 *degree- $\ell$  harmonic polynomials in dimension  $d$ , i.e., homogeneous polynomial solutions of Laplace’s*  
 105 *equation:*

$$\mathcal{H}_\ell(d) := \{P \in \mathcal{P}_\ell(d) : \Delta P = 0\},$$

106 where  $\Delta = \frac{\partial^2}{\partial x_1^2} + \dots + \frac{\partial^2}{\partial x_d^2}$  is the Laplace operator on  $\mathbb{R}^d$ . Finally, let  $\mathcal{H}_\ell(\mathbb{S}^{d-1})$  be the space of  
 107 (real) Spherical Harmonics of order  $\ell$  in dimension  $d$ , i.e. restrictions of harmonic polynomials in  
 108  $\mathcal{H}_\ell(d)$  to the sphere  $\mathbb{S}^{d-1}$ . The dimension of this space,  $\alpha_{\ell,d} \equiv \dim(\mathcal{H}_\ell(\mathbb{S}^{d-1}))$ , is

$$\alpha_{0,d} = 1, \quad \alpha_{1,d} = d, \quad \alpha_{\ell,d} = \binom{d+\ell-1}{\ell} - \binom{d+\ell-3}{\ell-2} \quad \text{for } \ell \geq 2.$$

### 109 2.1 Gegenbauer Polynomials

110 The Gegenbauer (a.k.a. ultraspherical) polynomial of degree  $\ell \geq 0$  in dimension  $d \geq 2$  is given by

$$P_d^\ell(t) := \sum_{j=0}^{\lfloor \ell/2 \rfloor} c_j \cdot t^{\ell-2j} \cdot (1-t^2)^j, \quad (3)$$

111 where  $c_0 = 1$  and  $c_{j+1} = -\frac{(\ell-2j)(\ell-2j-1)}{2(j+1)(d-1+2j)} \cdot c_j$  for  $j = 0, 1, \dots, \lfloor \ell/2 \rfloor - 1$ . These polynomials are  
 112 orthogonal on the interval  $[-1, 1]$  with respect to the measure  $(1-t^2)^{\frac{d-3}{2}}$ , i.e.,

$$\int_{-1}^1 P_d^\ell(t) \cdot P_d^{\ell'}(t) \cdot (1-t^2)^{\frac{d-3}{2}} dt = \frac{|\mathbb{S}^{d-1}|}{\alpha_{\ell,d} \cdot |\mathbb{S}^{d-2}|} \cdot \mathbb{1}_{\{\ell=\ell'\}}. \quad (4)$$

<sup>2</sup>Formally,  $L^2(\mathbb{S}^{d-1})$  is a space of equivalence classes of functions that differ at a set of points with measure 0. For notational simplicity, here and throughout we use  $f$  to denote the specific representative of the equivalence class  $f \in L^2(\mathbb{S}^{d-1})$ . In this way, we can consider the point-wise value  $f(w)$  for every  $w \in \mathbb{S}^{d-1}$ .

113 **Zonal Harmonics.** The Gegenbauer polynomials naturally provide positive definite dot-product  
 114 kernels on  $\mathbb{S}^{d-1}$  known as *Zonal Harmonics*, which are closely related to the spherical harmonics.  
 115 The following reproducing property of zonal harmonics plays a crucial role in our analysis.

116 **Lemma 1** (Reproducing Property of Zonal Harmonics). *Let  $P_d^\ell(\cdot)$  be the Gegenbauer polynomial*  
 117 *of degree  $\ell$  in dimension  $d$ . For any  $x, y \in \mathbb{S}^{d-1}$ :*

$$P_d^\ell(\langle x, y \rangle) = \alpha_{\ell,d} \cdot \mathbb{E}_{w \sim \mathcal{U}(\mathbb{S}^{d-1})} [P_d^\ell(\langle x, w \rangle) P_d^\ell(\langle y, w \rangle)],$$

118 *Furthermore, for any  $\ell' \neq \ell$ :*

$$\mathbb{E}_{w \sim \mathcal{U}(\mathbb{S}^{d-1})} [P_d^\ell(\langle x, w \rangle) \cdot P_d^{\ell'}(\langle y, w \rangle)] = 0.$$

119 The proof of this and all subsequent results can be found in the appendix. The following useful fact,  
 120 known as the addition theorem, connects Gegenbauer polynomials and spherical harmonics.

121 **Theorem 3** (Addition Theorem). *For every integer  $\ell \geq 0$ , if  $\{y_1^\ell, y_2^\ell, \dots, y_{\alpha_{\ell,d}}^\ell\}$  is an orthonormal*  
 122 *basis for  $\mathcal{H}_\ell(\mathbb{S}^{d-1})$ , then for any  $\sigma, w \in \mathbb{S}^{d-1}$  we have*

$$\frac{\alpha_{\ell,d}}{|\mathbb{S}^{d-1}|} \cdot P_d^\ell(\langle \sigma, w \rangle) = \sum_{j=1}^{\alpha_{\ell,d}} y_j^\ell(\sigma) \cdot y_j^\ell(w).$$

### 123 3 Reconstructing $L^2(\mathbb{S}^{d-1})$ Functions via Spherical Harmonics

124 In this section we show how to approximate any function  $f \in L^2(\mathbb{S}^{d-1})$  by spherical harmonics  
 125 using the optimal number of samples. We begin with the fact that spherical harmonics form a  
 126 complete set of orthonormal functions and thus form an orthonormal basis for the Hilbert space  
 127 of square-integrable functions on sphere  $\mathbb{S}^{d-1}$ . This is analogous to periodic functions, viewed  
 128 as functions defined on the circle  $\mathbb{S}^1$ , which can be expressed as a linear combination of circular  
 129 functions (sines and cosines) via the Fourier series.

130 **Lemma 2** (Direct Sum Decomposition of  $L^2(\mathbb{S}^{d-1})$ ). *The family of spaces  $\mathcal{H}_\ell(\mathbb{S}^{d-1})$  yields a*  
 131 *Hilbert space direct sum decomposition  $L^2(\mathbb{S}^{d-1}) = \bigoplus_{\ell=0}^{\infty} \mathcal{H}_\ell(\mathbb{S}^{d-1})$ : the summands are closed*  
 132 *and pairwise orthogonal, and every  $f \in L^2(\mathbb{S}^{d-1})$  is the sum of a converging series (in the sense of*  
 133 *mean-square convergence with the  $L^2$ -norm defined in Eq. (2)),*

$$f = \sum_{\ell=0}^{\infty} f_\ell,$$

134 *where  $f_\ell \in \mathcal{H}_\ell(\mathbb{S}^{d-1})$  are uniquely determined functions. Furthermore, given any orthonormal*  
 135 *basis  $\{y_1^\ell, y_2^\ell, \dots, y_{\alpha_{\ell,d}}^\ell\}$  of  $\mathcal{H}_\ell(\mathbb{S}^{d-1})$  we have  $f_\ell = \sum_{j=1}^{\alpha_{\ell,d}} \langle f, y_j^\ell \rangle_{\mathbb{S}^{d-1}} \cdot y_j^\ell$ .*

136 The series expansion in Lemma 2 is the analog of the Fourier expansion of periodic func-  
 137 tions, and is known as “generalized Fourier series” [Pen30] with respect to the Hilbert basis  
 138  $\{y_j^\ell : j \in [\alpha_{\ell,d}], \ell \geq 0\}$ . We remark that it is in general intractable to compute an orthogonal basis for  
 139 the space of spherical harmonics [MNY06], which renders the generalized Fourier series expansion  
 140 in Lemma 2 primarily existential. While finding the generalized Fourier expansion of a function  
 141  $f \in L^2(\mathbb{S}^{d-1})$  is computationally intractable, our goal is to answer the next fundamental question,  
 142 which is about finding the projection of a function  $f$  onto the space of spherical harmonics, i.e., the  
 143  $f_\ell$ ’s in Lemma 2. Concretely, we seek to solve the following problem.

144 **Problem 2.** *For an integer  $q \geq 0$  and a given function  $f \in L^2(\mathbb{S}^{d-1})$  whose decomposition over the*  
 145 *Hilbert sum  $\bigoplus_{\ell=0}^{\infty} \mathcal{H}_\ell(\mathbb{S}^{d-1})$  is  $f = \sum_{\ell=0}^{\infty} f_\ell$  as per Lemma 2, let us define the low-degree expansion*  
 146 *of this function as  $f^{(q)} := \sum_{\ell=0}^q f_\ell$ . How efficiently can we learn  $f^{(q)} \in \bigoplus_{\ell=0}^q \mathcal{H}_\ell(\mathbb{S}^{d-1})$ ?*  
 147 *More precisely, we want to find a set  $\{w_1, w_2, \dots, w_s\} \subseteq \mathbb{S}^{d-1}$  with minimal cardinality  $s$  along*  
 148 *with an efficient algorithm that given samples  $\{f(w_i)\}_{i=1}^s$  can interpolate  $f(\cdot)$  with a function*  
 149  *$\tilde{f}^{(q)} \in \bigoplus_{\ell=0}^q \mathcal{H}_\ell(\mathbb{S}^{d-1})$  such that:*

$$\|\tilde{f}^{(q)} - f^{(q)}\|_{\mathbb{S}^{d-1}}^2 \leq \varepsilon \cdot \|f^{(q)} - f\|_{\mathbb{S}^{d-1}}^2.$$

For ease of notation, we denote the Hilbert space of spherical harmonics of degree at most  $q$  by  $\mathcal{H}^{(q)}(\mathbb{S}^{d-1}) := \bigoplus_{\ell=0}^q \mathcal{H}_\ell(\mathbb{S}^{d-1})$ . To answer Problem 2 we exploit the close connection between the spherical harmonics and Gegenbauer polynomials, and in particular the fact that zonal harmonics are the reproducing kernels of the Hilbert spaces  $\mathcal{H}_\ell(\mathbb{S}^{d-1})$ .

**Lemma 3** (A Reproducing Kernel for  $\mathcal{H}_\ell(\mathbb{S}^{d-1})$ ). *For every  $f \in L^2(\mathbb{S}^{d-1})$ , if  $f = \sum_{\ell=0}^\infty f_\ell$  is the unique decomposition of  $f$  over  $\bigoplus_{\ell=0}^\infty \mathcal{H}_\ell(\mathbb{S}^{d-1})$  as per Lemma 2, then  $f_\ell$  is given by*

$$f_\ell(\sigma) = \alpha_{\ell,d} \cdot \mathbb{E}_{w \sim \mathcal{U}(\mathbb{S}^{d-1})} [f(w) P_d^\ell(\langle \sigma, w \rangle)] \quad \text{for } \sigma \in \mathbb{S}^{d-1}.$$

Now we define a kernel operator, based on the low-degree Gegenbauer polynomials, which projects functions onto their low-degree spherical harmonic expansion.

**Definition 2** (Projection Operator onto  $\mathcal{H}^{(q)}(\mathbb{S}^{d-1})$ ). *For any integers  $q \geq 0$  and  $d \geq 2$ , define the kernel operator  $\mathcal{K}_d^{(q)} : L^2(\mathbb{S}^{d-1}) \rightarrow L^2(\mathbb{S}^{d-1})$  as follows: for  $f \in L^2(\mathbb{S}^{d-1})$  and  $\sigma \in \mathbb{S}^{d-1}$ ,*

$$\left[ \mathcal{K}_d^{(q)} f \right](\sigma) := \sum_{\ell=0}^q \frac{\alpha_{\ell,d}}{|\mathbb{S}^{d-1}|} \langle f, P_d^\ell(\langle \sigma, \cdot \rangle) \rangle_{\mathbb{S}^{d-1}} = \sum_{\ell=0}^q \alpha_{\ell,d} \cdot \mathbb{E}_{w \sim \mathcal{U}(\mathbb{S}^{d-1})} [f(w) P_d^\ell(\langle \sigma, w \rangle)]. \quad (5)$$

This is an integral operator with kernel function  $k_{q,d}(\sigma, w) := \sum_{\ell=0}^q \frac{\alpha_{\ell,d}}{|\mathbb{S}^{d-1}|} \cdot P_d^\ell(\langle \sigma, w \rangle)$ .

Note that the operator  $\mathcal{K}_d^{(q)}$  is self-adjoint and positive semi-definite. Moreover, using the reproducing property of this kernel we can establish that  $\mathcal{K}_d^{(q)}$  is a projection operator.

**Claim 1.** *The operator  $\mathcal{K}_d^{(q)}$  defined in Definition 2 satisfies the property  $(\mathcal{K}_d^{(q)})^2 = \mathcal{K}_d^{(q)}$ .*

Furthermore, by the addition theorem (Theorem 3),  $\mathcal{K}_d^{(q)}$  is trace-class (i.e., the trace is finite and independent of the choice of basis) because:

$$\begin{aligned} \text{trace}(\mathcal{K}_d^{(q)}) &= \int_{\mathbb{S}^{d-1}} k_{q,d}(w, w) dw = \sum_{\ell=0}^q \frac{\alpha_{\ell,d}}{|\mathbb{S}^{d-1}|} \cdot \int_{\mathbb{S}^{d-1}} P_d^\ell(\langle w, w \rangle) dw \\ &= \sum_{\ell=0}^q \alpha_{\ell,d} = \binom{d+q-1}{q} + \binom{d+q-2}{q-1} - 1. \end{aligned} \quad (6)$$

By combining Theorem 3 and Lemma 2, and using the definition of the projection operator  $\mathcal{K}_d^{(q)}$ , it follows that for any function  $f \in L^2(\mathbb{S}^{d-1})$  with Hilbert sum decomposition  $f = \sum_{\ell=0}^\infty f_\ell$ , the low-degree component  $f^{(q)} = \sum_{\ell=0}^q f_\ell \in \mathcal{H}^{(q)}(\mathbb{S}^{d-1})$  can be computed as  $f^{(q)} = \mathcal{K}_d^{(q)} f$ . Equivalently, in order to learn  $f^{(q)}$ , it suffices to solve the following least-squares regression problem,

$$\min_{g \in L^2(\mathbb{S}^{d-1})} \left\| \mathcal{K}_d^{(q)} g - f \right\|_{\mathbb{S}^{d-1}}^2. \quad (7)$$

If  $g^*$  is an optimal solution to the above regression problem then  $f^{(q)} = \mathcal{K}_d^{(q)} g^*$ . In the next claim we show that solving the least squares problem in Eq. (7), even to a coarse approximation, is sufficient to solve our interpolation problem (i.e., Problem 2):

**Claim 2.** *For any  $f \in L^2(\mathbb{S}^{d-1})$ , any integer  $q \geq 0$ , and any  $C \geq 1$ , if  $\tilde{g} \in L^2(\mathbb{S}^{d-1})$  satisfies,*

$$\left\| \mathcal{K}_d^{(q)} \tilde{g} - f \right\|_{\mathbb{S}^{d-1}}^2 \leq C \cdot \min_{g \in L^2(\mathbb{S}^{d-1})} \left\| \mathcal{K}_d^{(q)} g - f \right\|_{\mathbb{S}^{d-1}}^2,$$

and if we let  $f^{(q)} := \mathcal{K}_d^{(q)} f$ , where  $\mathcal{K}_d^{(q)}$  is defined as per Definition 2, then the following holds

$$\left\| \mathcal{K}_d^{(q)} \tilde{g} - f^{(q)} \right\|_{\mathbb{S}^{d-1}}^2 \leq (C-1) \cdot \left\| f^{(q)} - f \right\|_{\mathbb{S}^{d-1}}^2.$$

Claim 2 shows that solving the regression problem in Eq. (7) approximately provides a solution to our spherical harmonics interpolation problem (Problem 2). But how can we solve this least-squares problem efficiently? Not only does the problem involve a possibly infinite dimensional parameter vector  $g$ , but the objective function also involves the continuous domain on the surface of  $\mathbb{S}^{d-1}$ .

### 3.1 Randomized Discretization via Leverage Function Sampling

We solve the continuous regression in Eq. (7) by randomly discretizing the sphere  $\mathbb{S}^{d-1}$ , thereby reducing our problem to a regression on a finite set of points  $w_1, w_2, \dots, w_s \in \mathbb{S}^{d-1}$ . In particular, we propose to sample points on  $\mathbb{S}^{d-1}$  with probability proportional to the so-called *leverage function*, a specific distribution that has been widely applied in randomized algorithms for linear algebra problems on discrete matrices [LMP13]. We start with the definition of the leverage function:

**Definition 3** (Leverage Function). *For integers  $q \geq 0$  and  $d > 0$ , we define the leverage function of the operator  $\mathcal{K}_d^{(q)}$  (see Definition 2) for every  $w \in \mathbb{S}^{d-1}$  as follows,*

$$\tau_q(w) := \max_{g \in L^2(\mathbb{S}^{d-1})} \left\| \mathcal{K}_d^{(q)} g \right\|_{\mathbb{S}^{d-1}}^{-2} \cdot \left| \left[ \mathcal{K}_d^{(q)} g \right] (w) \right|^2. \quad (8)$$

Intuitively,  $\tau_q(w)$  is an upper bound of how much a function that is spanned by the eigenfunctions of the operator  $\mathcal{K}_d^{(q)}$  can “blow up” at  $w$ . The larger the leverage function  $\tau_q(w)$  implies the higher the probability we will be required to sample  $w$ . This ensures that our sample points well reflect any possibly significant components, or “spikes”, of the function. Ultimately, the integral  $\int_{\mathbb{S}^{d-1}} \tau_q(w) dw$  determines how many samples we require to solve the regression problem Eq. (7) to a given accuracy. It is a known fact that the leverage function integrates to the rank of the operator  $\mathcal{K}_d^{(q)}$  (which is equal to the dimensionality of the Hilbert space  $\mathcal{H}^{(q)}(\mathbb{S}^{d-1})$ ). This ultimately allows us to achieve a  $\tilde{\mathcal{O}}(\sum_{\ell=0}^q \alpha_{\ell,d})$  sample complexity bound for solving Problem 2. To compute the leverage function, we make use of the following useful alternative characterization of the leverage function.

**Lemma 4** (Min Characterization of the Leverage Function). *For any  $w \in \mathbb{S}^{d-1}$ , let  $\tau_q(w)$  be the leverage function (Definition 3) and define  $\phi_w \in L^2(\mathbb{S}^{d-1})$  by  $\phi_w(\sigma) \equiv \sum_{\ell=0}^q \frac{\alpha_{\ell,d}}{|\mathbb{S}^{d-1}|} P_d^\ell(\langle \sigma, w \rangle)$ . We have the following minimization characterization of the leverage function:*

$$\tau_q(w) = \left\{ \min_{g \in L^2(\mathbb{S}^{d-1})} \|g\|_{\mathbb{S}^{d-1}}^2, \quad \text{s.t. } \mathcal{K}_d^{(q)} g = \phi_w \right\}. \quad (9)$$

Using the min and max characterizations of the leverage function we can find upper and lower bounds on this function. Surprisingly, in this case the upper and lower bounds match, so we actually have an exact value for the leverage function.

**Lemma 5** (Leverage Function is Constant). *The leverage function given in Definition 3 is equal to  $\tau_q(w) = \sum_{\ell=0}^q \frac{\alpha_{\ell,d}}{|\mathbb{S}^{d-1}|}$  for every  $w \in \mathbb{S}^{d-1}$ .*

We prove this lemma in Appendix C. The integral of the leverage function, which determines the total samples needed to solve our least-squares regression, is therefore equal to the dimensionality of the Hilbert space  $\mathcal{H}^{(q)}(\mathbb{S}^{d-1})$ .

**Corollary 1.** *The leverage function defined in Definition 3 integrates to the dimensionality of the Hilbert space  $\mathcal{H}^{(q)}(\mathbb{S}^{d-1})$ , which we denote by  $\beta_{q,d}$ , i.e.,*

$$\int_{\mathbb{S}^{d-1}} \tau_q(w) dw = \dim \left( \mathcal{H}^{(q)}(\mathbb{S}^{d-1}) \right) = \sum_{\ell=0}^q \alpha_{\ell,d} \equiv \beta_{q,d}.$$

We now show that the leverage function can be used to randomly sample the points on the unit sphere to discretize the regression problem in Eq. (7) and solve it approximately.

**Theorem 4** (Approximate Regression via Leverage Function Sampling). *For any  $\varepsilon > 0$ , let  $s = c \cdot \left( \beta_{q,d} \log \beta_{q,d} + \frac{\beta_{q,d}}{\varepsilon} \right)$ , for sufficiently large fixed constant  $c$ , and let  $x_1, x_2, \dots, x_s$  be i.i.d. uniform samples on  $\mathbb{S}^{d-1}$ . Define the quasi-matrix  $\mathbf{P} : \mathbb{R}^s \rightarrow L^2(\mathbb{S}^{d-1})$  as follows, for every  $v \in \mathbb{R}^d$ :*

$$[\mathbf{P} \cdot v](\sigma) := \sum_{\ell=0}^q \frac{\alpha_{\ell,d}}{\sqrt{s} \cdot |\mathbb{S}^{d-1}|} \cdot \sum_{j=1}^s v_j \cdot P_d^\ell(\langle x_j, \sigma \rangle) \quad \text{for } \sigma \in \mathbb{S}^{d-1}.$$

Also let  $\mathbf{f} \in \mathbb{R}^s$  be a vector with  $\mathbf{f}_j := \frac{1}{\sqrt{s}} \cdot f(x_j)$  for  $j = 1, 2, \dots, s$  and let  $\mathbf{P}^*$  be the adjoint of  $\mathbf{P}$ . If  $\tilde{g}$  is an optimal solution to the least-squares problem  $\tilde{g} \in \arg \min_{g \in L^2(\mathbb{S}^{d-1})} \|\mathbf{P}^* g - \mathbf{f}\|_2^2$ , then with probability at least  $1 - 10^{-4}$  the following holds,

$$\left\| \mathcal{K}_d^{(q)} \tilde{g} - f \right\|_{\mathbb{S}^{d-1}}^2 \leq (1 + \varepsilon) \cdot \min_{g \in L^2(\mathbb{S}^{d-1})} \left\| \mathcal{K}_d^{(q)} g - f \right\|_{\mathbb{S}^{d-1}}^2.$$



---

**Algorithm 1** Efficient Spherical Harmonic Expansion
 

---

- 1: **Input:** accuracy parameter  $\varepsilon > 0$ , integer  $q \geq 0$
  - 2: Set  $s = c \cdot (\beta_{q,d} \log \beta_{q,d} + \beta_{q,d}/\varepsilon)$  for sufficiently large fixed constant  $c$
  - 3: Sample i.i.d. random points  $w_1, w_2, \dots, w_s$  from  $\mathcal{U}(\mathbb{S}^{d-1})$
  - 4: Compute  $\mathbf{K} \in \mathbb{R}^{s \times s}$  with  $\mathbf{K}_{i,j} = \sum_{\ell=0}^q \frac{\alpha_{\ell,d}}{s \cdot |\mathbb{S}^{d-1}|} \cdot P_d^\ell(\langle w_i, w_j \rangle)$  for  $i, j \in [s]$
  - 5: Compute  $\mathbf{f} \in \mathbb{R}^s$  with  $\mathbf{f}_j = \frac{1}{\sqrt{s}} \cdot f(w_j)$  for  $j \in [s]$
  - 6: Solve the regression by computing  $\mathbf{z} = \mathbf{K}^\dagger \mathbf{f}$
  - 7: **Return:**  $y \in \mathcal{H}^{(q)}(\mathbb{S}^{d-1})$  with  $y(\sigma) := \sum_{\ell=0}^q \frac{\alpha_{\ell,d}}{\sqrt{s} \cdot |\mathbb{S}^{d-1}|} \cdot \sum_{j=1}^s \mathbf{z}_j \cdot P_d^\ell(\langle w_j, \sigma \rangle)$  for  $\sigma \in \mathbb{S}^{d-1}$
- 

217 We prove Theorem 4 in Appendix C. This theorem shows that the function  $\tilde{g}$  obtained from solving  
 218 the discretized regression problem provides an approximate solution to Eq. (7).

### 219 3.2 Efficient Solution for the Discretized Least-Squares Problem

220 In this section, we demonstrate how to apply Theorem 4 algorithmically to approximately solve the  
 221 regression problem of Eq. (7). Specifically, we show how to use the *kernel trick* to solve the randomly  
 222 discretized least squares problem efficiently in Algorithm 1 and its guarantee in Theorem 5.

223 **Theorem 5** (Efficient Spherical Harmonic Interpolation). *Algorithm 1 returns a function  $y \in$   
 224  $\mathcal{H}^{(q)}(\mathbb{S}^{d-1})$  such that, with probability at least  $1 - 10^{-4}$ :*

$$\|y - f^{(q)}\|_{\mathbb{S}^{d-1}}^2 \leq \varepsilon \cdot \|f^{(q)} - f\|_{\mathbb{S}^{d-1}}^2, \quad \text{where } f^{(q)} := \mathcal{K}_d^{(q)} f.$$

225 Suppose we can compute the Gegenbauer polynomial  $P_d^\ell(t)$  at every point  $t \in [-1, 1]$  in constant  
 226 time. Algorithm 1 queries the function  $f$  at  $s = \mathcal{O}\left(\beta_{q,d} \log \beta_{q,d} + \frac{\beta_{q,d}}{\varepsilon}\right)$  points on the sphere  $\mathbb{S}^{d-1}$   
 227 and runs in  $\mathcal{O}(s^2 \cdot d + s^\omega)$  time. This algorithm evaluates  $y(\sigma)$  in  $\mathcal{O}(d \cdot s)$  time for any  $\sigma \in \mathbb{S}^{d-1}$ .

228 We provide the proof of this theorem in Appendix D.

## 229 4 Lower Bound on The Number of Required Observations

230 We conclude by showing that the dimensionality of the Hilbert space  $\mathcal{H}^{(q)}(\mathbb{S}^{d-1})$  tightly characterizes  
 231 the sample complexity of Problem 2. Thus, our Theorem 5 is optimal up to a logarithmic factor. The  
 232 crucial fact we use for proving the lower bound is that all (non-zero) eigenvalues of the operator  
 233  $\mathcal{K}_d^{(q)}$  are equal to one. This fact follows from the addition theorem presented in Theorem 3, i.e., if  
 234  $\{y_1^\ell, y_2^\ell, \dots, y_{\alpha_{\ell,d}}^\ell\}$  is an orthonormal basis of  $\mathcal{H}_\ell(\mathbb{S}^{d-1})$ , then for any function  $f \in L^2(\mathbb{S}^{d-1})$ ,

$$\left[\mathcal{K}_d^{(q)} f\right](\sigma) = \sum_{\ell=0}^q \alpha_{\ell,d} \cdot \mathbb{E}_{w \sim \mathcal{U}(\mathbb{S}^{d-1})} \left[P_d^\ell(\langle \sigma, w \rangle) \cdot f(w)\right] = \sum_{\ell=0}^q \sum_{j=1}^{\alpha_{\ell,d}} \langle y_j^\ell, f \rangle_{\mathbb{S}^{d-1}} \cdot y_j^\ell(\sigma). \quad (10)$$

235

236 **Theorem 6** (Lower Bound). *Consider an error parameter  $\varepsilon > 0$ , and any (possibly randomized)  
 237 algorithm that solves Problem 2 with probability greater than  $1/10$  for any input function  $f$  and  
 238 makes at most  $r$  (possibly adaptive) queries on any input. Then  $r \geq \beta_{q,d}$ .*

239 We describe a distribution on input function  $f$  on which any deterministic algorithm that takes  
 240  $r < \beta_{q,d}$  samples fails with probability  $\geq 9/10$ . The theorem then follows by Yao's principle.

241 **Hard Input Distribution.** For integer  $\ell \leq q$ , consider an orthonormal basis of  $\mathcal{H}_\ell(\mathbb{S}^{d-1})$  and  
 242 denote it by  $\{y_1^\ell, y_2^\ell, \dots, y_{\alpha_{\ell,d}}^\ell\}$ . Let  $\mathbf{Y}_\ell : \mathbb{R}^{\alpha_{\ell,d}} \rightarrow \mathcal{H}_\ell(\mathbb{S}^{d-1})$  be the quasi-matrix with  $y_j^\ell$  as  
 243 its  $j^{\text{th}}$  column, i.e.,  $[\mathbf{Y}_\ell \cdot u](\sigma) := \sum_{j=1}^{\alpha_{\ell,d}} u_j \cdot y_j^\ell(\sigma)$  for any  $u \in \mathbb{R}^{\alpha_{\ell,d}}$  and  $\sigma \in \mathbb{S}^{d-1}$ . Let  
 244  $v^{(0)} \in \mathbb{R}^{\alpha_{0,d}}, v^{(1)} \in \mathbb{R}^{\alpha_{1,d}}, \dots, v^{(q)} \in \mathbb{R}^{\alpha_{q,d}}$  be independent random vectors with i.i.d. Gaussian  
 245 entries:  $v_j^{(\ell)} \sim \mathcal{N}(0, 1)$ . The random input is defined to be  $f := \sum_{\ell=0}^q \mathbf{Y}_\ell \cdot v^{(\ell)}$ . In other words,  $f =$

246  $\sum_{\ell=0}^q \mathbf{Y}_\ell \cdot v^{(\ell)}$  is a random linear combination of the eigenfunctions of  $\mathcal{K}_d^{(q)}$ . We prove that accurate  
 247 reconstruction of  $f$  drawn from the aforementioned distribution yields accurate reconstruction of  
 248 random vectors  $v^{(0)}, v^{(1)}, \dots, v^{(q)}$ . Since each  $v^{(\ell)}$  is  $\alpha_{\ell,d}$ -dimensional, this reconstruction requires  
 249  $\Omega(\sum_{\ell=0}^q \alpha_{\ell,d}) = \Omega(\beta_{q,d})$  samples, giving us a lower bound for accurate reconstruction of  $f$ .

250 First we show that finding an  $\tilde{f}^{(q)}$  satisfying the condition of Problem 2 is at least as hard as accurately  
 251 finding all vectors  $v^{(0)}, v^{(1)}, \dots, v^{(q)}$ . The following lemma is proved in Appendix E.

252 **Lemma 6.** *If a deterministic algorithm solves Problem 2 with probability at least  $1/10$  over our*  
 253 *random input distribution  $f = \sum_{\ell=0}^q \mathbf{Y}_\ell \cdot v^{(\ell)}$ , then with probability at least  $1/10$ , the output of the*  
 254 *algorithm  $\tilde{f}^{(q)}$  satisfies  $\mathbf{Y}_\ell^* \tilde{f}^{(q)} = v^{(\ell)}$  for all integers  $\ell \leq q$ .*

255 Finally, we complete the proof of Theorem 6 by arguing that if  $\tilde{f}^{(q)}$  is formed using less than  $\beta_{q,d}$   
 256 queries from  $f$ , then  $\sum_{\ell=0}^q \left\| \mathbf{Y}_\ell^* \tilde{f}^{(q)} - v^{(\ell)} \right\|_2^2 > 0$  with good probability, thus the bound of Lemma 6  
 257 cannot hold and  $\tilde{f}^{(q)}$  cannot be a solution to Problem 2. Assume for sake of contradiction that there  
 258 is a deterministic algorithm which solves Problem 2 with probability  $\geq 1/10$  over the random input  
 259  $f = \sum_{\ell=0}^q \mathbf{Y}_\ell \cdot v^{(\ell)}$  that makes  $r = \beta_{q,d} - 1$  queries on any input (we can modify an algorithm that  
 260 makes fewer queries to make exactly  $\beta_{q,d} - 1$  queries). For every  $\sigma \in \mathbb{S}^{d-1}$  and integer  $\ell \leq q$  define  
 261  $u_\sigma^\ell := [y_1^\ell(\sigma), y_2^\ell(\sigma), \dots, y_{\alpha_{\ell,d}}^\ell(\sigma)]$ . Also define  $\mathbf{u}_\sigma := [u_\sigma^0, u_\sigma^1, \dots, u_\sigma^q] \in \mathbb{R}^{\beta_{q,d}}$  and  $\mathbf{v} \in \mathbb{R}^{\beta_{q,d}}$  as  
 262  $\mathbf{v} := (v^{(0)}, v^{(1)}, \dots, v^{(q)})$ . Additionally, define the quasi-matrix  $\mathbf{Y} := [\mathbf{Y}_0, \dots, \mathbf{Y}_q]$ .

263 Using the above notations and the definition of the hard input instance  $f$ , each query to  $f$  is in  
 264 fact a query to the random vector  $\mathbf{v}$  in the form of  $f(\sigma) = \langle \mathbf{u}_\sigma, \mathbf{v} \rangle$ . Now consider a deterministic  
 265 function  $Q$ , that is given input  $\mathbf{V} \in \mathbb{R}^{i \times \beta_{q,d}}$  (for any positive integer  $i$ ) and outputs  $Q(\mathbf{V}) \in$   
 266  $\mathbb{R}^{\beta_{q,d} \times \beta_{q,d}}$  such that  $Q(\mathbf{V})$  has orthonormal rows with the first  $i$  rows spanning the  $i$  rows of  $\mathbf{V}$ . If  
 267  $\sigma_1, \sigma_2, \dots, \sigma_r \in \mathbb{S}^{d-1}$  denote the points where our algorithm queries the input  $f$ , for any integer  
 268  $i \in [r]$ , let  $\mathbf{Q}^i$  be an orthonormal matrix whose first  $i$  rows span the first  $i$  queries of the algorithm,  
 269 i.e.,  $\mathbf{Q}^i := Q([\mathbf{u}_{\sigma_1}, \mathbf{u}_{\sigma_2}, \dots, \mathbf{u}_{\sigma_i}]^\top)$ . Since the algorithm is deterministic,  $\mathbf{Q}^i$  is a deterministic  
 270 function of input  $\mathbf{v}$ . The following claim is proved in [AKM<sup>+</sup>19]:

271 **Claim 3** (Claim 23 of [AKM<sup>+</sup>19]). *Conditioned on the queries  $f(\sigma_1), f(\sigma_2), \dots, f(\sigma_r)$  for  $r <$*   
 272  *$\beta_{q,d}$ , the variable  $[\mathbf{Q}^r \cdot \mathbf{v}](\beta_{q,d})$  is distributed as  $\mathcal{N}(0, 1)$ .*

273 Now using Claim 3 we can write,

$$\begin{aligned} \Pr_{\mathbf{v}} \left[ \sum_{\ell=0}^q \left\| v^{(\ell)} - \mathbf{Y}_\ell^* \tilde{f}^{(q)} \right\|_2^2 = 0 \right] &= \Pr_{\mathbf{v}} \left[ \mathbf{Q}^r \mathbf{v} = \mathbf{Q}^r \mathbf{Y}^* \tilde{f}^{(q)} \right] \leq \Pr_{\mathbf{v}} \left[ [\mathbf{Q}^r \mathbf{v}]_{\beta_{q,d}} = [\mathbf{Q}^r \mathbf{Y}^* \tilde{f}^{(q)}]_{\beta_{q,d}} \right] \\ &= \mathbb{E} \left[ \Pr_{\mathbf{v}} \left[ [\mathbf{Q}^r \mathbf{v}]_{\beta_{q,d}} = [\mathbf{Q}^r \mathbf{Y}^* \tilde{f}^{(q)}]_{\beta_{q,d}} \mid f(\sigma_1), \dots, f(\sigma_r) \right] \right], \end{aligned}$$

274 where the expectation in the last line is taken over the randomness of  $f(\sigma_1), \dots, f(\sigma_r)$ . Conditioned  
 275 on  $f(\sigma_1), \dots, f(\sigma_r)$ ,  $[\mathbf{Q}^r \mathbf{Y}^* \tilde{f}^{(q)}]_{\beta_{q,d}}$  is a fixed quantity because the algorithm determines  $\tilde{f}^{(q)}$   
 276 given the knowledge of the queries  $f(\sigma_1), \dots, f(\sigma_r)$ . Furthermore, by Claim 3,  $[\mathbf{Q}^r \cdot \mathbf{v}]_{\beta_{q,d}}$  is a  
 277 random variable distributed as  $\mathcal{N}(0, 1)$ , conditioned on  $f(\sigma_1), \dots, f(\sigma_r)$ . This implies that,

$$\Pr \left[ [\mathbf{Q}^r \cdot \mathbf{v}]_{\beta_{q,d}} = [\mathbf{Q}^r \mathbf{Y}^* \tilde{f}^{(q)}]_{\beta_{q,d}} \mid f(\sigma_1), \dots, f(\sigma_r) \right] = 0.$$

278 Thus,  $\Pr \left[ \sum_{\ell=0}^q \left\| v^{(\ell)} - \mathbf{Y}_\ell^* \tilde{f}^{(q)} \right\|_2^2 = 0 \right] = \mathbb{E}_{f(\sigma_1), \dots, f(\sigma_r)} [0] = 0$ . However, we have assumed  
 279 that this algorithm solves Problem 2 with probability at least  $1/10$ , and hence, by Lemma 6,  
 280  $\Pr \left[ \sum_{\ell=0}^q \left\| v^{(\ell)} - \mathbf{Y}_\ell^* \tilde{f}^{(q)} \right\|_2^2 = 0 \right] \geq 1/10$ . This is a contradiction, yielding Theorem 6.

## 281 5 Numerical Evaluation

282 **Noise-free Setting.** For a fixed  $q$ , we generate a random function  $f(\sigma) = \sum_{\ell=0}^q c_\ell P_d^\ell(\langle \sigma, \mathbf{v} \rangle)$  where  
 283  $\mathbf{v} \sim \mathcal{U}(\mathbb{S}^{d-1})$  and  $c_\ell$ 's are i.i.d. samples from  $\mathcal{N}(0, 1)$ . Then,  $f$  is recovered by running Algorithm 1



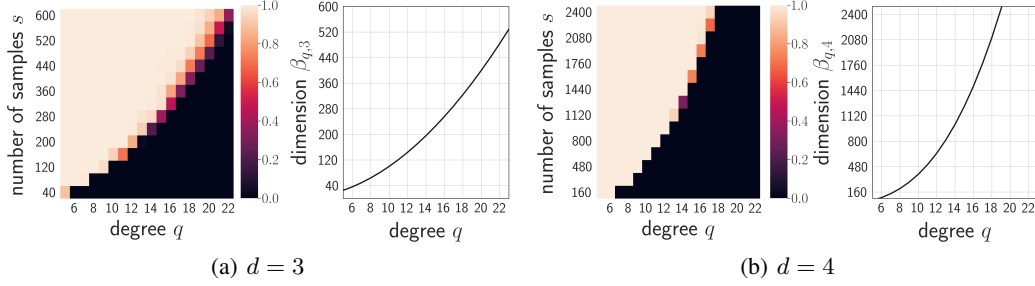

Figure 1: (Left) Empirical success probabilities of Algorithm 1 varying the number of samples  $s$  and the degree of spherical harmonic expansion  $q$ . (Right) The dimension  $\beta_{q,d}$  of the Hilbert space  $\mathcal{H}^{(q)}(\mathbb{S}^{d-1})$  as a function of  $q$  when (a)  $d = 3$  and (b)  $d = 4$ , respectively.

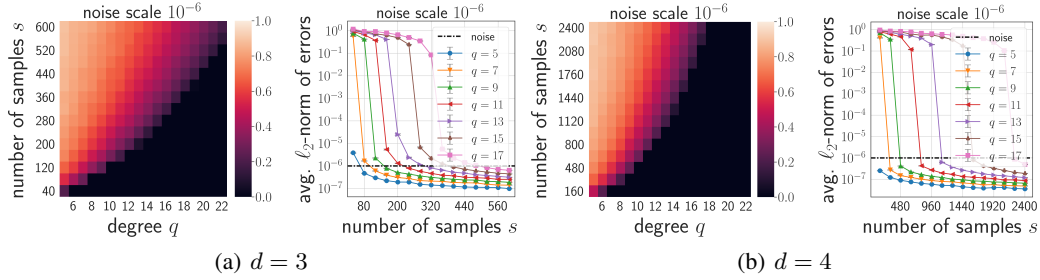

Figure 2: (Left) Empirical success probabilities of Algorithm 1 in presence of additive noise, where “success” means the error’s energy is below the noise level  $\|\tilde{f}^{(q)} - f\|_{\mathbb{S}^{d-1}} \leq \|n\|_{\mathbb{S}^{d-1}}$ . (Right) The error’s norm  $\|\tilde{f}^{(q)} - f\|_{\mathbb{S}^{d-1}}$  as a function of  $q$  when (a)  $d = 3$  and (b)  $d = 4$ , respectively.

with  $s$  random evaluations of  $f$  on  $\mathbb{S}^{d-1}$ . Note that  $\|\mathcal{K}_d^{(q)} f - f\|_{\mathbb{S}^{d-1}} = 0$  since  $f \in \mathcal{H}^{(q)}(\mathbb{S}^{d-1})$ , thus, as shown in Theorem 4, Algorithm 1 can recover  $f$  “exactly” using  $s = \mathcal{O}(\beta_{q,d} \log \beta_{q,d})$  evaluations, where  $\beta_{q,d}$  is the dimension of the Hilbert space  $\mathcal{H}^{(q)}(\mathbb{S}^{d-1})$ . We predict  $f$ ’s value on a random test set on  $\mathbb{S}^{d-1}$  and consider the algorithm fails if the testing error is greater than  $10^{-12}$ . We count the number of failures among 100 independent random trials with different choices of  $d \in \{3, 4\}$ ,  $q \in \{5, \dots, 22\}$ , and  $s \in \{40, \dots, 2400\}$ . The empirical success probabilities for  $d = 3$  and 4 are reported in Fig. 1(a) and Fig. 1(b), respectively. Fig. 1 illustrates that the success probabilities of our algorithm sharply transition to 1 as soon as the number of samples approaches  $s \approx \beta_{q,d}$  for a wide range of  $q$  and both  $d = 3, 4$ . These experimental results complement our Theorem 4 along with the lower bound analysis in Section 4 and empirically verify the performance of our algorithm.

**Noisy Setting.** We repeated our experiments in the presence of an additive noise which is a linear combination of random spherical harmonics of degrees  $q + 1$  to  $2q$ . More precisely, we let the noise be  $n(\sigma) = \sum_{\ell=q+1}^{2q} c_\ell P_d^\ell(\langle v, \sigma \rangle) \in \mathcal{H}^{(2q)}(\mathbb{S}^{d-1}) \setminus \mathcal{H}^{(q)}(\mathbb{S}^{d-1})$  for  $c_\ell$ ’s that are i.i.d. samples from  $\mathcal{N}(0, 1)$ . We then re-scale the noise to have norm  $\|n\|_{\mathbb{S}^{d-1}} = 10^{-6}$ . Furthermore, the function  $f$  is defined as before, and  $f$  is recovered by Algorithm 1 with  $s$  random evaluations of  $f + n$  on  $\mathbb{S}^{d-1}$ . The heat-maps in Fig. 2 are generated by considering an instance of our algorithm as a “success” if the error’s energy is below the noise level,  $\|\tilde{f}^{(q)} - f\|_{\mathbb{S}^{d-1}} \leq \|n\|_{\mathbb{S}^{d-1}} = 10^{-6}$ . The success probability transitions less sharply than the noiseless setting but the shift of probabilities starts at  $\beta_{s,q}$  samples.

## 6 Conclusion

We studied the problem of robustly recovering spherical harmonic expansion of a function defined on the sphere. The number of function evaluations needed to recover its degree- $q$  expansion is the dimension of spherical harmonics of degree at most  $q$ , up to a logarithmic factor. We develop a simple yet efficient kernel regression-based algorithm to recover degree- $q$  expansion of the function by only evaluating the function on uniformly sampled points on the sphere. Unlike the prior results on fast spherical harmonic transform, our algorithm works efficiently using a nearly optimal number of samples in any dimension. We believe our findings would appeal to the readership of the community.

## References

- [AH12] Kendall Atkinson and Weimin Han. *Spherical harmonics and approximations on the unit sphere: an introduction*. Springer Science & Business Media, 2012.
- [AKM<sup>+</sup>17] Haim Avron, Michael Kapralov, Cameron Musco, Christopher Musco, Ameya Velingker, and Amir Zandieh. *Random Fourier features for kernel ridge regression: Approximation bounds and statistical guarantees*. In *International Conference on Machine Learning (ICML)*, 2017.
- [AKM<sup>+</sup>19] Haim Avron, Michael Kapralov, Cameron Musco, Christopher Musco, Ameya Velingker, and Amir Zandieh. *A universal sampling method for reconstructing signals with simple fourier transforms*. In *Symposium on the Theory of Computing (STOC)*, 2019.
- [CKPS16] Xue Chen, Daniel M Kane, Eric Price, and Zhao Song. *Fourier-sparse interpolation without a frequency gap*. In *Foundations of Computer Science (FOCS)*, 2016.
- [CLL15] Pui Tung Choi, Ka Chun Lam, and Lok Ming Lui. *FLASH: Fast landmark aligned spherical harmonic parameterization for genus-0 closed brain surfaces*. *SIAM Journal on Imaging Sciences*, 2015.
- [CP19] Xue Chen and Eric Price. *Active Regression via Linear-Sample Sparsification*. In *Conference on Learning Theory (COLT)*, 2019.
- [EMM20] Tamás Erdélyi, Cameron Musco, and Christopher Musco. *Fourier sparse leverage scores and approximate kernel learning*. *Neural Information Processing Systems (NeurIPS)*, 2020.
- [GMMM21] B Ghorbani, S Mei, T Misiakiewicz, and A Montanari. *Linearized two-layers neural networks in high dimension*. *The Annals of Statistics*, 2021.
- [KFR03] Michael Kazhdan, Thomas Funkhouser, and Szymon Rusinkiewicz. *Rotation invariant spherical harmonic representation of 3 d shape descriptors*. In *Symposium on Geometry Processing*, 2003.
- [KKS97] Marc Kamionkowski, Arthur Kosowsky, and Albert Stebbins. *Statistics of cosmic microwave background polarization*. *Physical Review D*, 1997.
- [Lan12] Serge Lang. *Real and functional analysis*. Springer Science & Business Media, 2012.
- [LMP13] Mu Li, Gary L Miller, and Richard Peng. *Iterative row sampling*. In *Foundations of Computer Science (FOCS)*, 2013.
- [LP61] Henry J Landau and Henry O Pollak. *Prolate spheroidal wave functions, Fourier analysis and uncertainty—II*. *Bell System Technical Journal*, 1961.
- [LP62] Henry J Landau and Henry O Pollak. *Prolate spheroidal wave functions, fourier analysis and uncertainty—III: the dimension of the space of essentially time-and band-limited signals*. *Bell System Technical Journal*, 1962.
- [MNY06] Ha Quang Minh, Partha Niyogi, and Yuan Yao. *Mercer’s theorem, feature maps, and smoothing*. In *Conference on Learning Theory (COLT)*, 2006.
- [Mor98] Mitsuo Morimoto. *Analytic functionals on the sphere*. American Mathematical Soc., 1998.
- [Pen30] WO Pennell. *A generalized Fourier series representation of a function*. *The American Mathematical Monthly*, 1930.
- [RT06] Vladimir Rokhlin and Mark Tygert. *Fast algorithms for spherical harmonic expansions*. *SIAM Journal on Scientific Computing (SISC)*, 2006.
- [SA22] Paz Fink Shustin and Haim Avron. *Semi-Infinite Linear Regression and Its Applications*. *SIAM Journal on Matrix Analysis and Applications (SIMAX)*, 2022.

- 356 [SP61] David Slepian and Henry O Pollak. [Prolate spheroidal wave functions, Fourier analysis](#)  
357 [and uncertainty—I](#). *Bell System Technical Journal*, 1961.
- 358 [SS00] Paul N Swarztrauber and William F Spotz. [Generalized discrete spherical harmonic](#)  
359 [transforms](#). *Journal of Computational Physics*, 2000.
- 360 [ST02] Reiji Suda and Masayasu Takami. [A fast spherical harmonics transform algorithm](#).  
361 *Mathematics of Computation*, 2002.
- 362 [Wei95] DR Weimer. [Models of high-latitude electric potentials derived with a least error fit](#)  
363 [of spherical harmonic coefficients](#). *Journal of Geophysical Research: Space Physics*,  
364 1995.
- 365 [Wer97] Robert A Werner. [Spherical harmonic coefficients for the potential of a constant-density](#)  
366 [polyhedron](#). *Computers & Geosciences*, 1997.
- 367 [Wil12] Virginia Vassilevska Williams. [Multiplying matrices faster than Coppersmith-Winograd](#).  
368 In *Symposium on the Theory of Computing (STOC)*, 2012.
- 369 [XRY01] Hong Xiao, Vladimir Rokhlin, and Norman Yarvin. [Prolate spheroidal wavefunctions,](#)  
370 [quadrature and interpolation](#). *Inverse problems*, 2001.

## A Properties of Gegenbauer Polynomials and Spherical Harmonics

In this section we prove the basic properties of the Gegenbauer Polynomials as well as the Spherical Harmonics and establish the connection between the two. We start by the direct sum decomposition of the Hilbert space  $L^2(\mathbb{S}^{d-1})$  in terms of the spherical harmonics,

**Lemma 2** (Direct Sum Decomposition of  $L^2(\mathbb{S}^{d-1})$ ). *The family of spaces  $\mathcal{H}_\ell(\mathbb{S}^{d-1})$  yields a Hilbert space direct sum decomposition  $L^2(\mathbb{S}^{d-1}) = \bigoplus_{\ell=0}^{\infty} \mathcal{H}_\ell(\mathbb{S}^{d-1})$ : the summands are closed and pairwise orthogonal, and every  $f \in L^2(\mathbb{S}^{d-1})$  is the sum of a converging series (in the sense of mean-square convergence with the  $L^2$ -norm defined in Eq. (2)),*

$$f = \sum_{\ell=0}^{\infty} f_\ell,$$

where  $f_\ell \in \mathcal{H}_\ell(\mathbb{S}^{d-1})$  are uniquely determined functions. Furthermore, given any orthonormal basis  $\{y_1^\ell, y_2^\ell, \dots, y_{\alpha_{\ell,d}}^\ell\}$  of  $\mathcal{H}_\ell(\mathbb{S}^{d-1})$  we have  $f_\ell = \sum_{j=1}^{\alpha_{\ell,d}} \langle f, y_j^\ell \rangle_{\mathbb{S}^{d-1}} \cdot y_j^\ell$ .

*Proof.* This is in fact a standard result. For example, see [Lan12] for a proof.

□

Now we show that the Gegenbauer polynomials and spherical harmonics are related through the so called the addition theorem,

**Theorem 3** (Addition Theorem). *For every integer  $\ell \geq 0$ , if  $\{y_1^\ell, y_2^\ell, \dots, y_{\alpha_{\ell,d}}^\ell\}$  is an orthonormal basis for  $\mathcal{H}_\ell(\mathbb{S}^{d-1})$ , then for any  $\sigma, w \in \mathbb{S}^{d-1}$  we have*

$$\frac{\alpha_{\ell,d}}{|\mathbb{S}^{d-1}|} \cdot P_d^\ell(\langle \sigma, w \rangle) = \sum_{j=1}^{\alpha_{\ell,d}} y_j^\ell(\sigma) \cdot y_j^\ell(w).$$

*Proof.* The result can be proven analytically, using the properties of the Poisson kernel in the unit ball. This is classic and the proof can be found in [AH12, Theorem 2.9].

□

Next we show that the Gegenbauer kernels can project any function into the space of their corresponding spherical harmonics,

**Lemma 3** (A Reproducing Kernel for  $\mathcal{H}_\ell(\mathbb{S}^{d-1})$ ). *For every  $f \in L^2(\mathbb{S}^{d-1})$ , if  $f = \sum_{\ell=0}^{\infty} f_\ell$  is the unique decomposition of  $f$  over  $\bigoplus_{\ell=0}^{\infty} \mathcal{H}_\ell(\mathbb{S}^{d-1})$  as per Lemma 2, then  $f_\ell$  is given by*

$$f_\ell(\sigma) = \alpha_{\ell,d} \cdot \mathbb{E}_{w \sim \mathcal{U}(\mathbb{S}^{d-1})} [f(w) P_d^\ell(\langle \sigma, w \rangle)] \quad \text{for } \sigma \in \mathbb{S}^{d-1}.$$

*Proof.* This is a classic textbook result, see [Mor98].

□

Now we prove that the Gegenbauer kernels satisfy the reproducing property for the Hilbert space  $\mathcal{H}_\ell(\mathbb{S}^{d-1})$ .

**Lemma 1** (Reproducing Property of Zonal Harmonics). *Let  $P_d^\ell(\cdot)$  be the Gegenbauer polynomial of degree  $\ell$  in dimension  $d$ . For any  $x, y \in \mathbb{S}^{d-1}$ :*

$$P_d^\ell(\langle x, y \rangle) = \alpha_{\ell,d} \cdot \mathbb{E}_{w \sim \mathcal{U}(\mathbb{S}^{d-1})} [P_d^\ell(\langle x, w \rangle) P_d^\ell(\langle y, w \rangle)],$$

Furthermore, for any  $\ell' \neq \ell$ :

$$\mathbb{E}_{w \sim \mathcal{U}(\mathbb{S}^{d-1})} [P_d^\ell(\langle x, w \rangle) \cdot P_d^{\ell'}(\langle y, w \rangle)] = 0.$$

401 *Proof.* This result follows directly from the Funk–Hecke formula (See [AH12]). However, we  
 402 provide another proof here. First note that for every  $x \in \mathbb{S}^{d-1}$  the function  $P_d^\ell(\langle x, \cdot \rangle) \in \mathcal{H}_\ell(\mathbb{S}^{d-1})$ .  
 403 Therefore the first claim follow by applying Lemma 3 on function  $f(\sigma) = P_d^\ell(\langle x, \sigma \rangle)$  which also  
 404 satisfies  $f_\ell = f$ . On the other hand,  $P_d^{\ell'}(\langle y, \cdot \rangle) \in \mathcal{H}_{\ell'}(\mathbb{S}^{d-1})$  for every  $y \in \mathbb{S}^{d-1}$ . Thus, for  $\ell' \neq \ell$ ,  
 405 using the fact that spherical harmonics are orthogonal spaces of functions,  $P_d^{\ell'}(\langle y, \cdot \rangle) \perp \mathcal{H}_\ell(\mathbb{S}^{d-1})$ ,  
 406 which gives the second claim. □

408 Next we prove that the kernel operator defined in Definition 2 is in fact a projection operator,

409 **Claim 1.** *The operator  $\mathcal{K}_d^{(q)}$  defined in Definition 2 satisfies the property  $(\mathcal{K}_d^{(q)})^2 = \mathcal{K}_d^{(q)}$ .*

410 *Proof.* For every  $f \in L^2(\mathbb{S}^{d-1})$  and every  $\sigma \in \mathbb{S}^{d-1}$ , using Definition 2 we have,

$$\begin{aligned}
 \left[ (\mathcal{K}_d^{(q)})^2 f \right] (\sigma) &= \sum_{\ell'=0}^q \frac{\alpha_{\ell',d}}{|\mathbb{S}^{d-1}|} \left\langle \mathcal{K}_d^{(q)} f, P_d^{\ell'}(\langle \sigma, \cdot \rangle) \right\rangle_{\mathbb{S}^{d-1}} \\
 &= \sum_{\ell=0}^q \sum_{\ell'=0}^q \alpha_{\ell,d} \alpha_{\ell',d} \cdot \mathbb{E}_{w \sim \mathcal{U}(\mathbb{S}^{d-1})} \left[ P_d^{\ell'}(\langle \sigma, w \rangle) \cdot \mathbb{E}_{\tau \sim \mathcal{U}(\mathbb{S}^{d-1})} [P_d^\ell(\langle \tau, w \rangle) f(\tau)] \right] \\
 &= \sum_{\ell=0}^q \sum_{\ell'=0}^q \alpha_{\ell,d} \alpha_{\ell',d} \cdot \mathbb{E}_{\tau \sim \mathcal{U}(\mathbb{S}^{d-1})} \left[ f(\tau) \cdot \mathbb{E}_{w \sim \mathcal{U}(\mathbb{S}^{d-1})} [P_d^{\ell'}(\langle \sigma, w \rangle) P_d^\ell(\langle \tau, w \rangle)] \right] \\
 &= \sum_{\ell=0}^q \alpha_{\ell,d} \cdot \mathbb{E}_{\tau \sim \mathcal{U}(\mathbb{S}^{d-1})} [f(\tau) \cdot P_d^\ell(\langle \sigma, \tau \rangle)] \\
 &= [\mathcal{K}_d^{(q)} f] (\sigma),
 \end{aligned}$$

411 where the fourth line above follows from Lemma 1. This proves the claim. □

## 413 B Reducing the Interpolation Problem to a Least-Squares Regression

414 In this section we show that our spherical harmonic interpolation problem, i.e., Problem 2, can be  
 415 solved by approximately solving a least-squares problem as claimed in Claim 2. We start by showing  
 416 that for any function  $f \in L^2(\mathbb{S}^{d-1})$ ,  $\mathcal{K}_d^{(q)} f$  gives its low-degree component. More precisely, let  
 417  $f = \sum_{\ell=0}^{\infty} f_\ell$  be the decomposition of  $f$  over the Hilbert sum  $\bigoplus_{\ell=0}^{\infty} \mathcal{H}_\ell(\mathbb{S}^{d-1})$  as per Lemma 2. Now  
 418 if we let  $\mathcal{K}_d^{(q)}$  be the kernel operator from Definition 2 and if  $\{y_1^\ell, y_2^\ell, \dots, y_{\alpha_{\ell,d}}^\ell\}$  is an orthonormal  
 419 basis for  $\mathcal{H}_\ell(\mathbb{S}^{d-1})$ , then by Theorem 3 we have,

$$\begin{aligned}
 [\mathcal{K}_d^{(q)} f] (\sigma) &= \sum_{\ell=0}^q \alpha_{\ell,d} \cdot \mathbb{E}_{w \sim \mathcal{U}(\mathbb{S}^{d-1})} [f(w) P_d^\ell(\langle \sigma, w \rangle)] \\
 &= \sum_{\ell=0}^q |\mathbb{S}^{d-1}| \cdot \mathbb{E}_{w \sim \mathcal{U}(\mathbb{S}^{d-1})} \left[ f(w) \cdot \sum_{j=1}^{\alpha_{\ell,d}} y_j^\ell(\sigma) \cdot y_j^\ell(w) \right] \\
 &= \sum_{\ell=0}^q \sum_{j=1}^{\alpha_{\ell,d}} y_j^\ell(\sigma) \cdot |\mathbb{S}^{d-1}| \cdot \mathbb{E}_{w \sim \mathcal{U}(\mathbb{S}^{d-1})} [f(w) \cdot y_j^\ell(w)] \\
 &= \sum_{\ell=0}^q \sum_{j=1}^{\alpha_{\ell,d}} \langle f, y_j^\ell(w) \rangle_{\mathbb{S}^{d-1}} \cdot y_j^\ell(\sigma) \\
 &= \sum_{\ell=0}^q f_\ell(\sigma) = f^{(q)}(\sigma),
 \end{aligned}$$

where the second line above follows from Theorem 3, the fourth line follows from Eq. (2), and the last line follows from Lemma 2. This proves that the low-degree component  $f^{(q)} = \mathcal{K}_d^{(q)} f$ .

**Claim 2.** For any  $f \in L^2(\mathbb{S}^{d-1})$ , any integer  $q \geq 0$ , and any  $C \geq 1$ , if  $\tilde{g} \in L^2(\mathbb{S}^{d-1})$  satisfies,

$$\left\| \mathcal{K}_d^{(q)} \tilde{g} - f \right\|_{\mathbb{S}^{d-1}}^2 \leq C \cdot \min_{g \in L^2(\mathbb{S}^{d-1})} \left\| \mathcal{K}_d^{(q)} g - f \right\|_{\mathbb{S}^{d-1}}^2,$$

and if we let  $f^{(q)} := \mathcal{K}_d^{(q)} f$ , where  $\mathcal{K}_d^{(q)}$  is defined as per Definition 2, then the following holds

$$\left\| \mathcal{K}_d^{(q)} \tilde{g} - f^{(q)} \right\|_{\mathbb{S}^{d-1}}^2 \leq (C - 1) \cdot \left\| f^{(q)} - f \right\|_{\mathbb{S}^{d-1}}^2.$$

*Proof.* First, note that  $g^* = f$  is an optimal solution to the least-squares problem in Eq. (7). Thus we have,

$$\min_{g \in L^2(\mathbb{S}^{d-1})} \left\| \mathcal{K}_d^{(q)} g - f \right\|_{\mathbb{S}^{d-1}}^2 = \left\| \mathcal{K}_d^{(q)} f - f \right\|_{\mathbb{S}^{d-1}}^2 = \left\| f^{(q)} - f \right\|_{\mathbb{S}^{d-1}}^2.$$

Next, we can write,

$$\begin{aligned} \left\| \mathcal{K}_d^{(q)} \tilde{g} - f \right\|_{\mathbb{S}^{d-1}}^2 &= \left\| \mathcal{K}_d^{(q)} \tilde{g} - \mathcal{K}_d^{(q)} f + (\mathcal{K}_d^{(q)} f - f) \right\|_{\mathbb{S}^{d-1}}^2 \\ &= \left\| \mathcal{K}_d^{(q)} (\tilde{g} - f) + (\mathcal{K}_d^{(q)} f - f) \right\|_{\mathbb{S}^{d-1}}^2 \\ &= \left\| \mathcal{K}_d^{(q)} (\tilde{g} - f) \right\|_{\mathbb{S}^{d-1}}^2 + \left\| \mathcal{K}_d^{(q)} f - f \right\|_{\mathbb{S}^{d-1}}^2 \\ &= \left\| \mathcal{K}_d^{(q)} \tilde{g} - f^{(q)} \right\|_{\mathbb{S}^{d-1}}^2 + \left\| f^{(q)} - f \right\|_{\mathbb{S}^{d-1}}^2, \end{aligned}$$

where the third line follows from the Pythagorean theorem because  $\mathcal{K}_d^{(q)} (\tilde{g} - f) \in \mathcal{H}^{(q)}(\mathbb{S}^{d-1})$  while  $\mathcal{K}_d^{(q)} f - f = -\sum_{\ell > q} f_\ell$ , thus  $(\mathcal{K}_d^{(q)} f - f) \perp \mathcal{H}^{(q)}(\mathbb{S}^{d-1})$ . Combining the two equalities above with inequality  $\left\| \mathcal{K}_d^{(q)} \tilde{g} - f \right\|_{\mathbb{S}^{d-1}}^2 \leq C \cdot \min_{g \in L^2(\mathbb{S}^{d-1})} \left\| \mathcal{K}_d^{(q)} g - f \right\|_{\mathbb{S}^{d-1}}^2$  given in the statement of the claim, proves Claim 2.  $\square$

## C Approximate Regression via Leverage Score Sampling

In this section we ultimately prove our main result of Theorem 4. We start by proving useful properties of the leverage function given in Definition 3. First, we show the fact that the leverage function can be characterized in terms of a least-squares minimization problem, which is crucial for computing the leverage scores distribution. This fact was previously exploited in [AKM<sup>+</sup>17] and [AKM<sup>+</sup>19] in the context of Fourier operators.

**Lemma 4** (Min Characterization of the Leverage Function). For any  $w \in \mathbb{S}^{d-1}$ , let  $\tau_q(w)$  be the leverage function (Definition 3) and define  $\phi_w \in L^2(\mathbb{S}^{d-1})$  by  $\phi_w(\sigma) \equiv \sum_{\ell=0}^q \frac{\alpha_{\ell,d}}{|\mathbb{S}^{d-1}|} P_d^\ell(\langle \sigma, w \rangle)$ . We have the following minimization characterization of the leverage function:

$$\tau_q(w) = \left\{ \min_{g \in L^2(\mathbb{S}^{d-1})} \|g\|_{\mathbb{S}^{d-1}}^2, \quad \text{s.t. } \mathcal{K}_d^{(q)} g = \phi_w \right\}. \quad (9)$$

We remark that this lemma is in fact an adaptation and generalization of Theorem 5 of [AKM<sup>+</sup>19]. We prove this lemma here for the sake of completeness.

*Proof.* First we show that the right hand side of Eq. (9) is never smaller than the leverage function in Definition 3. Let  $g_w^* \in L^2(\mathbb{S}^{d-1})$  be the optimal solution of Eq. (9) for any  $w \in \mathbb{S}^{d-1}$ . Note that the



445 optimal solution satisfies  $\mathcal{K}_d^{(q)} g_w^* = \phi_w$ . Thus, for any function  $f \in L^2(\mathbb{S}^{d-1})$ , using Definition 2,  
 446 we can write

$$\begin{aligned}
 \left| \left[ \mathcal{K}_d^{(q)} f \right] (w) \right|^2 &= \left| \sum_{\ell=0}^q \alpha_{\ell,d} \cdot \mathbb{E}_{\sigma \sim \mathcal{U}(\mathbb{S}^{d-1})} [P_d^\ell(\langle \sigma, w \rangle) \cdot f(\sigma)] \right|^2 \\
 &= |\langle \phi_w, f \rangle_{\mathbb{S}^{d-1}}|^2 = \left| \left\langle \mathcal{K}_d^{(q)} g_w^*, f \right\rangle_{\mathbb{S}^{d-1}} \right|^2 \\
 &= \left| \left\langle g_w^*, \mathcal{K}_d^{(q)} f \right\rangle_{\mathbb{S}^{d-1}} \right|^2 && \text{(because } \mathcal{K}_d^{(q)} \text{ is self-adjoint)} \\
 &\leq \|g_w^*\|_{\mathbb{S}^{d-1}}^2 \cdot \left\| \mathcal{K}_d^{(q)} f \right\|_{\mathbb{S}^{d-1}}^2 && \text{(by Cauchy-Schwarz inequality)}
 \end{aligned}$$

447 Therefore, for any  $f \in L^2(\mathbb{S}^{d-1})$  with  $\left\| \mathcal{K}_d^{(q)} f \right\|_{\mathbb{S}^{d-1}} > 0$ , we have

$$\frac{\left| \left[ \mathcal{K}_d^{(q)} f \right] (w) \right|^2}{\left\| \mathcal{K}_d^{(q)} f \right\|_{\mathbb{S}^{d-1}}^2} \leq \|g_w^*\|_{\mathbb{S}^{d-1}}^2. \quad (11)$$

448 We conclude the proof by showing that the maximum value is attained. First, we show that the  
 449 optimal solution  $g_w^*$  of Eq. (9) satisfies the property that  $\mathcal{K}_d^{(q)} g_w^* = g_w^*$ . Suppose for the sake of  
 450 contradiction that  $\mathcal{K}_d^{(q)} g_w^* \neq g_w^*$ . In this case, Claim 1 implies that,

$$\mathcal{K}_d^{(q)} \left( \mathcal{K}_d^{(q)} g_w^* - g_w^* \right) = \left( \mathcal{K}_d^{(q)} \right)^2 g_w^* - \mathcal{K}_d^{(q)} g_w^* = \mathcal{K}_d^{(q)} g_w^* - \mathcal{K}_d^{(q)} g_w^* = 0.$$

451 Thus, the function  $g = \mathcal{K}_d^{(q)} g_w^*$  satisfies the constraint of the minimization problem in Eq. (9). Now,  
 452 using the above and the fact that  $\mathcal{K}_d^{(q)}$  is self-adjoint we can write,

$$\left\langle \mathcal{K}_d^{(q)} g_w^*, \mathcal{K}_d^{(q)} g_w^* - g_w^* \right\rangle_{\mathbb{S}^{d-1}} = \left\langle g_w^*, \mathcal{K}_d^{(q)} \left( \mathcal{K}_d^{(q)} g_w^* - g_w^* \right) \right\rangle_{\mathbb{S}^{d-1}} = 0.$$

453 This shows that  $\mathcal{K}_d^{(q)} g_w^* \perp \left( \mathcal{K}_d^{(q)} g_w^* - g_w^* \right)$ , hence by Pythagorean theorem we have,

$$\|g_w^*\|_{\mathbb{S}^{d-1}}^2 = \left\| \mathcal{K}_d^{(q)} g_w^* \right\|_{\mathbb{S}^{d-1}}^2 + \left\| \mathcal{K}_d^{(q)} g_w^* - g_w^* \right\|_{\mathbb{S}^{d-1}}^2 > \left\| \mathcal{K}_d^{(q)} g_w^* \right\|_{\mathbb{S}^{d-1}}^2 = \|g\|_{\mathbb{S}^{d-1}}^2,$$

454 which is in contrast with the assumption that  $g_w^*$  is the optimal solution of Eq. (9). Therefore, our  
 455 claim that  $\mathcal{K}_d^{(q)} g_w^* = g_w^*$  holds.

456 Now, we show that for  $f = g_w^*$ , the maximum value in inequality Eq. (11) is attained. For any  
 457  $w \in \mathbb{S}^{d-1}$  we have the following

$$\left[ \mathcal{K}_d^{(q)} f \right] (w) = \left\langle \mathcal{K}_d^{(q)} g_w^*, f \right\rangle_{\mathbb{S}^{d-1}} = \langle g_w^*, g_w^* \rangle_{\mathbb{S}^{d-1}} = \|g_w^*\|_{\mathbb{S}^{d-1}}^2.$$

458 On the other hand we have  $\left\| \mathcal{K}_d^{(q)} f \right\|_{\mathbb{S}^{d-1}}^2 = \|g_w^*\|_{\mathbb{S}^{d-1}}^2$ . Thus,  $\left\| \mathcal{K}_d^{(q)} f \right\|_{\mathbb{S}^{d-1}}^{-2} \cdot \left| \left[ \mathcal{K}_d^{(q)} f \right] (w) \right|^2 =$   
 459  $\|g_w^*\|_{\mathbb{S}^{d-1}}^2$  which implies that  $\tau_q(w) = \|g_w^*\|_{\mathbb{S}^{d-1}}^2$  and thus proves the lemma.

460 □

461 Next we prove that the leverage function is constant.

462 **Lemma 5** (Leverage Function is Constant). *The leverage function given in Definition 3 is equal to*  
 463  $\tau_q(w) = \sum_{\ell=0}^q \frac{\alpha_{\ell,d}}{|\mathbb{S}^{d-1}|}$  *for every*  $w \in \mathbb{S}^{d-1}$ .

464 *Proof.* First we prove that  $\tau_q(w) \leq \sum_{\ell=0}^q \frac{\alpha_{\ell,d}}{|\mathbb{S}^{d-1}|}$  using the min-characterization. If we let  $\phi_w \in$   
 465  $L^2(\mathbb{S}^{d-1})$  be defined as  $\phi_w(\sigma) := \sum_{\ell=0}^q \frac{\alpha_{\ell,d}}{|\mathbb{S}^{d-1}|} P_d^\ell(\langle \sigma, w \rangle)$ , then by Definition 2, for every  $\sigma \in \mathbb{S}^{d-1}$

466 we can write,

$$\begin{aligned}
\left[\mathcal{K}_d^{(q)}\phi_w\right](\sigma) &= \sum_{\ell=0}^q \alpha_{\ell,d} \cdot \mathbb{E}_{v \sim \mathcal{U}(\mathbb{S}^{d-1})} \left[ P_d^\ell(\langle \sigma, v \rangle) \cdot \phi_w(v) \right] \\
&= \sum_{\ell=0}^q \sum_{\ell'=0}^q \frac{\alpha_{\ell,d} \alpha_{\ell',d}}{|\mathbb{S}^{d-1}|} \cdot \mathbb{E}_{v \sim \mathcal{U}(\mathbb{S}^{d-1})} \left[ P_d^\ell(\langle \sigma, v \rangle) \cdot P_d^{\ell'}(\langle v, w \rangle) \right] \\
&= \sum_{\ell=0}^q \frac{\alpha_{\ell,d}}{|\mathbb{S}^{d-1}|} P_d^\ell(\langle \sigma, w \rangle) = \phi_w(\sigma),
\end{aligned} \tag{12}$$

467 where the third line above follows from Lemma 1. Therefore, the test function  $g := \phi_w$  satisfies the  
468 constraint of the minimization in Eq. (9), i.e.,  $\mathcal{K}_d^{(q)}g = \phi_w$ . Thus, Lemma 4 implies that,

$$\tau_q(w) \leq \|g\|_{\mathbb{S}^{d-1}}^2 = \|\phi_w\|_{\mathbb{S}^{d-1}}^2 = \sum_{\ell=0}^q \frac{\alpha_{\ell,d}}{|\mathbb{S}^{d-1}|},$$

469 where the equality above follows from Lemma 1 along with Eq. (2). This establishes the upper bound  
470 on the leverage function that we sought to prove.

471 Now, using the maximization characterization of the leverage function in Definition 3, we prove that  
472  $\tau_q(w) \geq \sum_{\ell=0}^q \frac{\alpha_{\ell,d}}{|\mathbb{S}^{d-1}|}$ . Again, we consider the same test function  $g = \phi_w$  and write,

$$\begin{aligned}
\left\| \mathcal{K}_d^{(q)}\phi_w \right\|_{\mathbb{S}^{d-1}}^{-2} \cdot \left| \left[ \mathcal{K}_d^{(q)}\phi_w \right](w) \right|^2 &= \frac{|\phi_w(w)|^2}{\|\phi_w\|_{\mathbb{S}^{d-1}}^2} \\
&= \frac{\left| \sum_{\ell=0}^q \frac{\alpha_{\ell,d}}{|\mathbb{S}^{d-1}|} P_d^\ell(\langle w, w \rangle) \right|^2}{\sum_{\ell=0}^q \frac{\alpha_{\ell,d}}{|\mathbb{S}^{d-1}|}} \\
&= \frac{\left| \sum_{\ell=0}^q \frac{\alpha_{\ell,d}}{|\mathbb{S}^{d-1}|} P_d^\ell(1) \right|^2}{\sum_{\ell=0}^q \frac{\alpha_{\ell,d}}{|\mathbb{S}^{d-1}|}} = \sum_{\ell=0}^q \frac{\alpha_{\ell,d}}{|\mathbb{S}^{d-1}|},
\end{aligned}$$

473 where the first and second line above follow from Eq. (12) and Lemma 1, respectively. Therefore, the  
474 max characterization of the leverage function in Definition 3 implies that,

$$\tau_q(w) \geq \left\| \mathcal{K}_d^{(q)}\phi_w \right\|_{\mathbb{S}^{d-1}}^{-2} \cdot \left| \left[ \mathcal{K}_d^{(q)}\phi_w \right](w) \right|^2 = \sum_{\ell=0}^q \frac{\alpha_{\ell,d}}{|\mathbb{S}^{d-1}|}.$$

475 This completes the proof of Lemma 5 and establishes that  $\tau_q(w)$  is uniformly equal to  $\sum_{\ell=0}^q \frac{\alpha_{\ell,d}}{|\mathbb{S}^{d-1}|}$ .

476 □

477 To prove Theorem 4, we need to use prior results about solving linear systems in continuous setting  
478 via leverage score sampling. In particular, we use Theorem 6.3 from [CP19], which is restated below,  
479

480 **Theorem 7** (Theorem 6.3 of [CP19]). *Consider any dimension  $n$  linear space  $\mathcal{F}$  of functions  
481 from a domain  $G$  to  $\mathbb{R}$ . Let  $D$  be a distribution over  $G$  and  $f$  be some function from  $G$   
482 to  $\mathbb{R}$ . Also, define the norm with respect to  $D$  of any function  $h : G \rightarrow \mathbb{R}$  as  $\|h\|_D^2 :=$   
483  $\mathbb{E}_{x \sim D}[|h(x)|^2]$  and let  $y = \arg \min_{h \in \mathcal{F}} \|h - f\|_D^2$ . Fix any distribution  $D'$  over  $G$  and let  
484  $K_{D'} := \sup_{x \in G} \sup_{h \in \mathcal{F}} \left\{ \frac{D(x)}{D'(x)} \cdot \frac{|h(x)|^2}{\|h\|_D^2} \right\}$ .*

485 *For i.i.d. sample query points  $x_1, x_2, \dots, x_s \sim D'$  and weights  $w_i = \frac{D(x_i)}{s \cdot D'(x_i)}$  for  $i \in [s]$ , let the  
486 weighted ERM estimator  $\tilde{f}_s$  be defined as  $\tilde{f}_s := \arg \min_{h \in \mathcal{F}} \sum_{i=1}^s w_i \cdot |h(x_i) - f(x_i)|^2$ . For any  
487  $\varepsilon > 0$  and a sufficiently large fixed constant  $c$ , if the number of queries  $s \geq c \cdot \left( K_{D'} \log n + \frac{K_{D'}}{\varepsilon} \right)$ ,  
488 then the weighted ERM estimator  $\tilde{f}_s$  satisfies,*

$$\Pr \left[ \left\| \tilde{f}_s - y \right\|_D^2 \leq \varepsilon \cdot \|f - y\|_D^2 \right] \geq 1 - 10^{-4}.$$

Now we are ready to prove Theorem 4. Our approach is to apply Theorem 7 to the space of degree  $q$  spherical harmonics  $\mathcal{H}^{(q)}(\mathbb{S}^{d-1})$  and use the fact that the leverage scores distribution of the operator  $\mathcal{K}_d^{(q)}$  are uniform on the unit sphere  $\mathbb{S}^{d-1}$ .

**Theorem 4** (Approximate Regression via Leverage Function Sampling). *For any  $\varepsilon > 0$ , let  $s = c \cdot \left( \beta_{q,d} \log \beta_{q,d} + \frac{\beta_{q,d}}{\varepsilon} \right)$ , for sufficiently large fixed constant  $c$ , and let  $x_1, x_2, \dots, x_s$  be i.i.d. uniform samples on  $\mathbb{S}^{d-1}$ . Define the quasi-matrix  $\mathbf{P} : \mathbb{R}^s \rightarrow L^2(\mathbb{S}^{d-1})$  as follows, for every  $v \in \mathbb{R}^d$ :*

$$[\mathbf{P} \cdot v](\sigma) := \sum_{\ell=0}^q \frac{\alpha_{\ell,d}}{\sqrt{s} \cdot |\mathbb{S}^{d-1}|} \cdot \sum_{j=1}^s v_j \cdot P_d^\ell(\langle x_j, \sigma \rangle) \quad \text{for } \sigma \in \mathbb{S}^{d-1}.$$

Also let  $\mathbf{f} \in \mathbb{R}^s$  be a vector with  $\mathbf{f}_j := \frac{1}{\sqrt{s}} \cdot f(x_j)$  for  $j = 1, 2, \dots, s$  and let  $\mathbf{P}^*$  be the adjoint of  $\mathbf{P}$ . If  $\tilde{g}$  is an optimal solution to the least-squares problem  $\tilde{g} \in \arg \min_{g \in L^2(\mathbb{S}^{d-1})} \|\mathbf{P}^* g - \mathbf{f}\|_2^2$ , then with probability at least  $1 - 10^{-4}$  the following holds,

$$\left\| \mathcal{K}_d^{(q)} \tilde{g} - f \right\|_{\mathbb{S}^{d-1}}^2 \leq (1 + \varepsilon) \cdot \min_{g \in L^2(\mathbb{S}^{d-1})} \left\| \mathcal{K}_d^{(q)} g - f \right\|_{\mathbb{S}^{d-1}}^2.$$

*Proof.* We prove this theorem by invoking Theorem 7. To do so, we first let the space  $\mathcal{F}$  of function from  $\mathbb{S}^{d-1}$  to  $\mathbb{R}$  be  $\mathcal{F} := \mathcal{H}^{(q)}(\mathbb{S}^{d-1})$ . It is clear that the space of spherical harmonics is a linear space of functions because of the existence of the kernel operator  $\mathcal{K}_d^{(q)}$  which is a projection operator onto  $\mathcal{H}^{(q)}(\mathbb{S}^{d-1})$ , so  $\mathcal{F}$  satisfies the first precondition of Theorem 7. Additionally, the dimension of this space of functions is  $n = \beta_{q,d}$ .

Also, let  $D$  be a uniform distribution over the unit sphere  $\mathbb{S}^{d-1}$ . For this distribution, the norm defined in Theorem 7 satisfies  $\|h\|_{\mathbb{S}^{d-1}}^2 = |\mathbb{S}^{d-1}| \cdot \|h\|_D^2$ , for any  $h \in L^2(\mathbb{S}^{d-1})$ . Moreover, let  $D'$  be a uniform distribution over the unit sphere  $\mathbb{S}^{d-1}$  as well.

Now we show that for these choices of  $\mathcal{F}$ ,  $D$ ,  $D'$ , the condition number  $K_{D'}$  defined as per Theorem 7 is equal to  $\beta_{q,d}$ . We can write,

$$\begin{aligned} K_{D'} &:= \sup_{x \in \mathbb{S}^{d-1}} \sup_{h \in \mathcal{F}} \left\{ \frac{D(x)}{D'(x)} \cdot \frac{|h(x)|^2}{\|h\|_D^2} \right\} \\ &= |\mathbb{S}^{d-1}| \cdot \sup_{x \in \mathbb{S}^{d-1}} \sup_{h \in \mathcal{F}} \left\{ \frac{|h(x)|^2}{\|h\|_{\mathbb{S}^{d-1}}^2} \right\} \\ &= |\mathbb{S}^{d-1}| \cdot \sup_{x \in \mathbb{S}^{d-1}} \sup_{g \in L^2(\mathbb{S}^{d-1})} \left\{ \frac{\left| \left[ \mathcal{K}_d^{(q)} g \right](x) \right|^2}{\left\| \mathcal{K}_d^{(q)} g \right\|_{\mathbb{S}^{d-1}}^2} \right\} \\ &= |\mathbb{S}^{d-1}| \cdot \sup_{x \in \mathbb{S}^{d-1}} \tau_q(x) \\ &= \beta_{q,d}, \end{aligned}$$

where the second line above follows from the fact that  $D$ ,  $D'$  are both equal to the uniform distribution over  $\mathbb{S}^{d-1}$  and  $\|h\|_{\mathbb{S}^{d-1}}^2 = |\mathbb{S}^{d-1}| \cdot \|h\|_D^2$ . The third line above follows from the fact that any function  $h \in \mathcal{H}^{(q)}(\mathbb{S}^{d-1})$  can be expressed as  $h = \mathcal{K}_d^{(q)} g$  for some  $g \in L^2(\mathbb{S}^{d-1})$  because  $\mathcal{K}_d^{(q)}$  is the projection operator onto  $\mathcal{H}^{(q)}(\mathbb{S}^{d-1})$ . The fourth line follows from Definition 3 and last line follows from Lemma 5.

Finally, in order to invoke Theorem 7, we can write that the weighted ERM estimator  $\tilde{f}_s$  is equal to the following,

$$\begin{aligned}\tilde{f}_s &:= \arg \min_{h \in \mathcal{F}} \sum_{i=1}^s w_i \cdot |h(x_i) - f(x_i)|^2 \\ &= \arg \min_{g \in L^2(\mathbb{S}^{d-1})} \sum_{i=1}^s w_i \cdot \left| \left[ \mathcal{K}_d^{(q)} g \right] (x_i) - f(x_i) \right|^2 \\ &= \arg \min_{g \in L^2(\mathbb{S}^{d-1})} \sum_{i=1}^s \left| \frac{1}{\sqrt{s}} \cdot \left[ \mathcal{K}_d^{(q)} g \right] (x_i) - \mathbf{f}_i \right|^2 \\ &= \arg \min_{g \in L^2(\mathbb{S}^{d-1})} \| \mathbf{P}^* g - \mathbf{f} \|_2^2,\end{aligned}$$

where the third line above uses the definition of  $\mathbf{f}_i = \frac{1}{\sqrt{s}} f(x_i)$ , and the last line follows from the definition of adjoint of the quasi-matrix  $\mathbf{P}$ . Therefore, the theorem follows by invoking Theorem 7.

□

## D Efficient Algorithm for Spherical Harmonic Interpolation

In this section we prove our main theorem about our spherical harmonic interpolation algorithm.

**Theorem 5** (Efficient Spherical Harmonic Interpolation). *Algorithm 1 returns a function  $y \in \mathcal{H}^{(q)}(\mathbb{S}^{d-1})$  such that, with probability at least  $1 - 10^{-4}$ :*

$$\left\| y - f^{(q)} \right\|_{\mathbb{S}^{d-1}}^2 \leq \varepsilon \cdot \left\| f^{(q)} - f \right\|_{\mathbb{S}^{d-1}}^2, \quad \text{where } f^{(q)} := \mathcal{K}_d^{(q)} f.$$

Suppose we can compute the Gegenbauer polynomial  $P_d^\ell(t)$  at every point  $t \in [-1, 1]$  in constant time. Algorithm 1 queries the function  $f$  at  $s = \mathcal{O}\left(\beta_{q,d} \log \beta_{q,d} + \frac{\beta_{q,d}}{\varepsilon}\right)$  points on the sphere  $\mathbb{S}^{d-1}$  and runs in  $\mathcal{O}(s^2 \cdot d + s^\omega)$  time. This algorithm evaluates  $y(\sigma)$  in  $\mathcal{O}(d \cdot s)$  time for any  $\sigma \in \mathbb{S}^{d-1}$ .

*Proof.* First note that the random points  $w_1, w_2, \dots, w_s$  in line 3 of Algorithm 1 are i.i.d. sample with uniform distribution on the surface of  $\mathbb{S}^{d-1}$ . Therefore, we can invoke Theorem 4. More specifically, if we let  $\mathbf{P}$  be the quasi-matrix defined in Theorem 4 corresponding to the random points  $w_1, w_2, \dots, w_s$  sampled in line 3 and if we let  $\mathbf{f}$  be the vector of function samples defined in line 5 of the algorithm, then with probability at least  $1 - 10^{-4}$ , any optimal solution to the following least-squares problem

$$\tilde{g} \in \arg \min_{g \in L^2(\mathbb{S}^{d-1})} \| \mathbf{P}^* g - \mathbf{f} \|_2^2, \quad (13)$$

satisfies the following,

$$\left\| \mathcal{K}_d^{(q)} \tilde{g} - f \right\|_{\mathbb{S}^{d-1}}^2 \leq (1 + \varepsilon) \cdot \min_{g \in L^2(\mathbb{S}^{d-1})} \left\| \mathcal{K}_d^{(q)} g - f \right\|_{\mathbb{S}^{d-1}}^2. \quad (14)$$

Now note that the least-squares problem in Eq. (13) has at least one optimal solution  $\tilde{g}$  which is in the eigenspace of the operator  $\mathbf{P}\mathbf{P}^*$ . More specifically, there exists a vector  $\mathbf{z} \in \mathbb{R}^s$  such that  $\tilde{g} = \mathbf{P} \cdot \mathbf{z}$  is an optimal solution for Eq. (13). Therefore, we can focus on finding this optimal solution by solving the following least-squares problem

$$\mathbf{z} \in \arg \min_{\mathbf{z} \in \mathbb{R}^s} \| \mathbf{P}^* \mathbf{P} \mathbf{z} - \mathbf{f} \|_2^2,$$

and then letting  $\tilde{g} = \mathbf{P} \cdot \mathbf{z}$ . This  $\tilde{g}$  is guaranteed to be an optimal solution for Eq. (13), thus it satisfies Eq. (14). We solve the above least-squares problem using the kernel trick. In fact we show that  $\mathbf{P}^* \mathbf{P}$  is equal to the kernel matrix  $\mathbf{K}$  computed in line 4 of Algorithm 1. To see why, note that for any

539  $i, j \in [s]$  we have,

$$\begin{aligned}
[\mathbf{P}^* \mathbf{P}]_{i,j} &= \left\langle \sum_{\ell=0}^q \frac{\alpha_{\ell,d}}{\sqrt{s} \cdot |\mathbb{S}^{d-1}|} \cdot P_d^\ell(\langle w_i, \cdot \rangle), \sum_{\ell=0}^q \frac{\alpha_{\ell,d}}{\sqrt{s} \cdot |\mathbb{S}^{d-1}|} \cdot P_d^\ell(\langle w_j, \cdot \rangle) \right\rangle_{\mathbb{S}^{d-1}} \\
&= \sum_{\ell=0}^q \sum_{\ell'=0}^q \frac{\alpha_{\ell,d} \alpha_{\ell',d}}{s \cdot |\mathbb{S}^{d-1}|^2} \cdot \left\langle P_d^\ell(\langle w_i, \cdot \rangle), P_d^{\ell'}(\langle w_j, \cdot \rangle) \right\rangle_{\mathbb{S}^{d-1}} \\
&= \sum_{\ell=0}^q \sum_{\ell'=0}^q \frac{\alpha_{\ell,d} \alpha_{\ell',d}}{s \cdot |\mathbb{S}^{d-1}|} \cdot \mathbb{E}_{v \sim \mathcal{U}(\mathbb{S}^{d-1})} \left[ P_d^\ell(\langle w_i, v \rangle) \cdot P_d^{\ell'}(\langle w_j, v \rangle) \right] \\
&= \sum_{\ell=0}^q \frac{\alpha_{\ell,d}}{s \cdot |\mathbb{S}^{d-1}|} \cdot P_d^\ell(\langle w_i, w_j \rangle) = \mathbf{K}_{i,j},
\end{aligned}$$

540 where the fourth line above follows from Lemma 1. Therefore, we are interested in the optimal  
541 solution of the following least-squares problem

$$\mathbf{z} \in \arg \min_{\mathbf{x} \in \mathbb{R}^s} \|\mathbf{K} \mathbf{x} - \mathbf{f}\|_2^2.$$

542 The least-squares solution to the above problem is  $\mathbf{z} = \mathbf{K}^\dagger \mathbf{f}$  which is exactly what is computed  
543 in line 6 of the algorithm. Now note that, the function  $\tilde{g} = \mathbf{P} \cdot \mathbf{z}$  satisfies Eq. (14). Because  
544  $\tilde{g} = \mathbf{P} \cdot \mathbf{z} \in \mathcal{H}^{(q)}(\mathbb{S}^{d-1})$  and because  $\mathcal{K}_d^{(q)}$  is an orthonormal projection operator into  $\mathcal{H}^{(q)}(\mathbb{S}^{d-1})$ ,  
545 we have  $\mathcal{K}_d^{(q)} \cdot \tilde{g} = \tilde{g} = \mathbf{P} \cdot \mathbf{z}$ . This together with Eq. (14) imply that,

$$\|\mathbf{P} \cdot \mathbf{z} - f\|_{\mathbb{S}^{d-1}}^2 \leq (1 + \varepsilon) \cdot \min_{g \in L^2(\mathbb{S}^{d-1})} \left\| \mathcal{K}_d^{(q)} g - f \right\|_{\mathbb{S}^{d-1}}^2.$$

546 Now if we invoke Claim 2 with  $C = 1 + \varepsilon$  on the above inequality we find that,

$$\left\| \mathbf{P} \cdot \mathbf{z} - f^{(q)} \right\|_{\mathbb{S}^{d-1}}^2 \leq \varepsilon \cdot \left\| f^{(q)} - f \right\|_{\mathbb{S}^{d-1}}^2.$$

547 Finally, one can easily see that the function  $y \in \mathcal{H}^{(q)}(\mathbb{S}^{d-1})$  that Algorithm 1 outputs in line 7 is  
548 exactly equal to  $y = \mathbf{P} \cdot \mathbf{z}$ . This completes the accuracy bound of the theorem.

549 **Runtime and Sample Complexity.** these bounds follow from observing that:

- 550 •  $s \cdot d$  time is needed to generate  $w_1, w_2, \dots, w_s$  in line 3 of the algorithm. To do this, we  
551 first generate random Gaussian points in  $\mathbb{R}^d$  and then project them onto  $\mathbb{S}^{d-1}$  by normalizing  
552 them.
- 553 •  $s^2 \cdot d$  operations are needed to form the kernel matrix  $\mathbf{K}$  in line 4 of the algorithm.
- 554 •  $s$  queries to function  $f$  are needed to form the samples vector  $\mathbf{f}$  in line 5 of the algorithm.
- 555 •  $s^\omega$  time is needed to compute the least-squares solution  $\mathbf{z} = \mathbf{K}^\dagger \mathbf{f}$  in line 6 of the algorithm.
- 556 •  $s \cdot d$  operations are needed to evaluate the output function  $y(\sigma)$  in line 7 of the algorithm.

557 This completes the proof of Theorem 5. □

## 558 E Lower Bound: Claims and Lemmas

559 In this section we prove the Claims and Lemmas used in our lower bound analysis for proving  
560 Theorem 6.

561 **Claim 4.** Given the random input  $f = \sum_{\ell=0}^q \mathbf{Y}_\ell \cdot v^{(\ell)}$  generated as described in Section 4, to solve  
562 Problem 2, an algorithm must return a function  $\tilde{f}^{(q)} \in \mathcal{H}^{(q)}(\mathbb{S}^{d-1})$  such that  $\|\tilde{f}^{(q)} - f\|_{\mathbb{S}^{d-1}}^2 = 0$ .

563 *Proof.* Note that Problem 2 requires recovering a function  $\tilde{f}^{(q)} \in \mathcal{H}^{(q)}(\mathbb{S}^{d-1})$  such that:

$$\left\| \tilde{f}^{(q)} - f^{(q)} \right\|_{\mathbb{S}^{d-1}}^2 \leq \varepsilon \cdot \left\| f^{(q)} - f \right\|_{\mathbb{S}^{d-1}}^2, \quad (15)$$

564 where  $f^{(q)} = \mathcal{K}_d^{(q)} f$ . Using the definition of the input function  $f = \sum_{\ell=0}^q \mathbf{Y}_\ell \cdot v^{(\ell)}$ , we can write,

$$\begin{aligned} f^{(q)} &= \mathcal{K}_d^{(q)} f = \sum_{\ell=0}^q \mathcal{K}_d^{(q)} \cdot \mathbf{Y}_\ell \cdot v^{(\ell)} \\ &= \sum_{\ell=0}^q \left( \sum_{\ell'=0}^q \mathbf{Y}_{\ell'} \mathbf{Y}_{\ell'}^* \right) \cdot \mathbf{Y}_\ell \cdot v^{(\ell)} \\ &= \sum_{\ell=0}^q \mathbf{Y}_\ell \cdot v^{(\ell)} = f, \end{aligned}$$

565 where the equality in the second line above follows from Eq. (10) and the addition theorem in  
 566 Theorem 3, and the third line follows because the operator  $\mathbf{Y}_\ell$  has orthonormal columns and thus  
 567  $\mathbf{Y}_{\ell'}^* \mathbf{Y}_\ell = I_{\alpha_{\ell,d}} \cdot \mathbb{1}_{\{\ell=\ell'\}}$ . Therefore, plugging this into Eq. (15) gives,

$$\left\| \tilde{f}^{(q)} - f \right\|_{\mathbb{S}^{d-1}}^2 = \left\| \tilde{f}^{(q)} - f^{(q)} \right\|_{\mathbb{S}^{d-1}}^2 \leq \varepsilon \cdot \left\| f^{(q)} - f \right\|_{\mathbb{S}^{d-1}}^2 = \varepsilon \cdot \left\| f - f \right\|_{\mathbb{S}^{d-1}}^2 = 0.$$

568 □

569 **Lemma 6.** *If a deterministic algorithm solves Problem 2 with probability at least 1/10 over our*  
 570 *random input distribution  $f = \sum_{\ell=0}^q \mathbf{Y}_\ell \cdot v^{(\ell)}$ , then with probability at least 1/10, the output of the*  
 571 *algorithm  $\tilde{f}^{(q)}$  satisfies  $\mathbf{Y}_\ell^* \tilde{f}^{(q)} = v^{(\ell)}$  for all integers  $\ell \leq q$ .*

572 *Proof.* By Claim 4, the output of the algorithm that solves Problem 2, satisfies  $\left\| \tilde{f}^{(q)} - f \right\|_{\mathbb{S}^{d-1}}^2 = 0$ .  
 573 Therefore, by orthonormality of the columns of the operator  $\mathbf{Y}_\ell$ , we can write,

$$\mathbf{Y}_\ell^* \tilde{f}^{(q)} = \mathbf{Y}_\ell^* f + \mathbf{Y}_\ell^* (\tilde{f}^{(q)} - f) = \sum_{\ell'=0}^q \mathbf{Y}_\ell^* \mathbf{Y}_{\ell'} \cdot v^{(\ell')} = v^{(\ell)}.$$

574 □
